# Supplementary material for: Measurement report: Elevated atmospheric ammonia may promote particle pH and HONO formation – insights from the COVID-19 pandemic
Source: Copernicus journal article supplement (doi:10.5194/acp-24-9885-2024), 2024-09-06
Supplement: Supplementary file 1 [file acp-24-9885-2024-supplement.pdf]

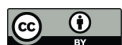

*Supplement of*

## **Measurement report: Elevated atmospheric ammonia may promote particle pH and HONO formation – insights from the COVID-19 pandemic**

**Xinyuan Zhang et al.**

*Correspondence to:* Shenbo Wang ([shbwang@zzu.edu.cn](mailto:shbwang@zzu.edu.cn)) and Ruiqin Zhang ([rqzhang@zzu.edu.cn](mailto:rqzhang@zzu.edu.cn))

The copyright of individual parts of the supplement might differ from the article licence.

1 **S1. Detailed description of the aerosol and gas monitor.**

2 The aerosol and gas monitor (MARGA, Metrohm, Switzerland) was used to analyze  
3 the hourly water-soluble ions ( $\text{Na}^+$ ,  $\text{NH}_4^+$ ,  $\text{K}^+$ ,  $\text{Mg}^{2+}$ ,  $\text{Ca}^{2+}$ ,  $\text{Cl}^-$ ,  $\text{NO}_3^-$ , and  $\text{SO}_4^{2-}$ ) in  
4  $\text{PM}_{2.5}$ , as well as gaseous species ( $\text{NH}_3$ ,  $\text{HNO}_3$ ,  $\text{HCl}$ , and  $\text{HONO}$ ) at ten sampling sites.  
5 The atmospheric sample passes through a  $\text{PM}_{2.5}$  cut-off head, and both particles and  
6 gases enter a wet rotating dissolution device for diffusion. Subsequently, the particles  
7 in the sample undergo hygroscopic growth and condensation in an aerosol  
8 supersaturated vapor generator, followed by collection and ion chromatographic  
9 analysis. The gases in the sample are oxidized by  $\text{H}_2\text{O}_2$  in the dissolution device,  
10 absorbed into a liquid solvent, and then entered the gas sample collection chamber for  
11 ion chromatographic quantification. During this process, the sample is extracted  
12 through a liquid diffusion filter, where interfering acidic and alkaline gases are removed.  
13 To achieve high collection efficiency, the airflow containing loaded ions then enters an  
14 aerosol supersaturated collector until the particles can be injected into the ion  
15 chromatograph. The ion chromatography system utilizes either suppressor or non-  
16 suppressor conductivity detection methods for ion analysis. Before running the samples,  
17 the ion chromatograph system needs to be calibrated using standard solutions. By  
18 comparing the data obtained from the sample with the data obtained from known  
19 standard solutions, the identification and quantification of sample ions can be  
20 performed. The data acquisition system generates chromatograms, and the

21 chromatography software further converts each peak in the chromatogram into sample  
22 concentrations and outputs the results.

### 23 QA/QC

24 The instrument underwent daily checks and maintenance, which typically involved  
25 ensuring the stability of the internal standard response and maintaining a relative error  
26 within  $\pm 10\%$  between the measured and theoretical concentrations of the internal  
27 standard. The system's data acquisition and transmission were carefully examined,  
28 along with monitoring the instrument's status information and collected data. This  
29 included checking parameters such as sampling flow rate, chromatographic column  
30 pressure, column temperature, conductivity, target compound peak retention time, and  
31 peak width to ensure their normal functioning. Regular replacement of consumables  
32 used by the instrument was carried out at predetermined intervals and frequencies.  
33 Additionally, standard curve measurements and calibration were performed in each  
34 season to guarantee the accuracy of the instrument's data. Calibration curve verification  
35 was performed at least once per quarter. A standard series containing at least 6  
36 calibration points, including zero concentration, was prepared using standard solutions.  
37 The concentration range of the calibration curve was set according to the actual  
38 environmental concentration levels and determined by manual injection. The obtained  
39 calibration curve had a linear correlation coefficient ( $r$ ) of  $\geq 0.995$ . If this requirement  
40 was not met, the rationality of the internal standard solution concentration settings  
41 would be checked. When key components such as the quantitative loop,

42 chromatographic column, or suppressor are replaced, a new calibration curve will be  
43 promptly established. After establishing the new calibration curve, the sample sequence  
44 in the analysis software would be updated. The minimum detection limit was  
45 determined as follows:  $0.002 \mu\text{g}/\text{m}^3$  ( $\text{Cl}^-$ ),  $0.081 \mu\text{g}/\text{m}^3$  ( $\text{NH}_4^+$ ),  $0.02 \mu\text{g}/\text{m}^3$  ( $\text{NO}_3^-$ ),  $0.06$   
46  $\mu\text{g}/\text{m}^3$  ( $\text{SO}_4^{2-}$ ),  $0.002 \mu\text{g}/\text{m}^3$  ( $\text{Na}^+$ ),  $0.08 \mu\text{g}/\text{m}^3$  ( $\text{K}^+$ ),  $0.06 \mu\text{g}/\text{m}^3$  ( $\text{Ca}^{2+}$ ) and  $0.007 \mu\text{g}/\text{m}^3$   
47 ( $\text{Mg}^{2+}$ ). According to the research about the uncertainties in MARGA measurements,  
48 such as a 20% uncertainty for MARGA measurements (Song et al., 2018), an error of  
49 10% for detecting  $\text{SO}_4^{2-}$ ,  $\text{NO}_3^-$ , and  $\text{HNO}_3$ , and 15% for  $\text{NH}_3$  and  $\text{NH}_4^+$  (Rumsey et al.,  
50 2014), we set the uncertainties of 20% for  $\text{NH}_3$  and  $\text{NH}_4^+$  10% for other components.  
51 Due to the complex conditions encountered during the actual sampling process,  
52 including variations in calibration slopes, sampling volumes, solvent concentrations,  
53 temperature, atmospheric pressure, and sampling flow rates at different sampling points,  
54 the assumed values mentioned above may not accurately reflect the actual situation.

## 55 **S2. HONO measurement**

56 The HONO monitoring method adopted in MARGA is the wet-flow diffusion tube  
57 method (WEDD) in the diffusion tube method (C.Zellweger, 1999;Takeuchi M, 2013),  
58 which is a common method for measuring HONO in wet chemistry and has high  
59 absorption efficiency. The device adopts a vertical setting, through the diffusion tube,  
60 the air in the atmosphere is pulled upward from the bottom, and the absorbent liquid is  
61 transported to the top of the diffusion tube through the air pump. When flowing under  
62 the action of gravity, a thin absorbent liquid film will be generated on the inner surface  
63 of the tube by the tension. The absorbent liquid film will absorb HONO, and the  
64 solution at the bottom of the diffusion tube will be sucked out through the air pump.  
65 Then it is sent to the ion chromatography for analysis. The integration time of the  
66 sample mainly depends on the running time of the ion chromatography, which is about  
67 5-30 min (C.Zellweger, 1999;Takeuchi M, 2013). Based on the original, some scholars  
68 developed the flow injection-chemiluminescence method and used it together with  
69 WEDD for the measurement of HONO. The detection limit is about  $0.03 \mu\text{g}/\text{m}^3$   
70 (Mikuska et al., 2008;Zhao et al., 2010). In addition, HONO observations measured  
71 with this AIM-IC system agree well with HONO observations measured with the other  
72 systems (VandenBoer et al., 2014). Therefore, it is feasible to measure HONO using  
73 this instrument.

74 **S3. Detailed description of the NO<sub>2</sub>, SO<sub>2</sub> and carbon analyzer.**

75 The NO<sub>2</sub> analyzer utilized the chemiluminescence technique to measure the  
76 concentration of NO<sub>2</sub> in the air. This involved converting NO<sub>2</sub> to NO using a  
77 molybdenum converter, and then quantifying the NO concentration. The principle  
78 behind the SO<sub>2</sub> analyzer involved measuring the amount of ultraviolet light emitted  
79 during the decay of high-energy state SO<sub>2</sub>. This emitted light was used to calculate the  
80 concentration of SO<sub>2</sub>.

81 The carbon analyzer principle is primarily based on the NIOSH-5040 method, which  
82 involves analyzing the thermal optical transmittance of quartz filter samples. It employs  
83 a calibrated non-dispersive infrared sensor to detect the evolving carbon. Under  
84 controlled conditions with inert helium gas, carbon formed during a gradually  
85 increasing temperature gradient is referred to as OC, while carbon evolved under a  
86 mixture of 90% helium.

87 **S4. Sources of HONO**

88 4.1 Direct emission

89 HONO can be released directly into the atmosphere through vehicle exhaust  
90 (Burling et al., 2010; Veres et al., 2010). The lifetime of HONO in the atmosphere is  
91 relatively short, so vehicle emissions significantly contribute to urban atmospheric  
92 HONO (Chen et al., 2023; Liu et al., 2021a). Considering that there has been a

93 significant reduction in vehicle emissions in urban areas during DC. Additionally, the  
94 R-PY site is far from roads. Thus, vehicle emissions may not be the primary source of  
95 HONO for the U-ZK site during DC and R-PY sites during entire periods. To further  
96 validate the above conclusions, the conditional bivariate probability function diagrams  
97 of NO<sub>2</sub> at U-ZK and R-PY sites during PC and DC are depicted in Figure S2. NO<sub>2</sub>  
98 predominantly originated from long-distance transport at the U-ZK site during DC and  
99 the R-PY site during both PC and DC. Consequently, vehicle emissions are only  
100 calculated for the U-ZK site during the PC.

101 Here we use the HONO/NO<sub>x</sub> ratio to estimate HONO concentration, which is  
102 generally considered to be the vehicle emission factor (Kramer et al., 2020;Hao et al.,  
103 2020;Yu et al., 2022) for HONO. The calculation formula is as follows:

$$104 \quad [\text{HONO}_{\text{emi}}] = 0.8\% \times [\text{NO}_x] \quad (\text{S1})$$

105 where [HONO<sub>emi</sub>] and [NO<sub>x</sub>] represent the HONO concentration emitted by vehicles  
106 and the observed NO<sub>x</sub> concentration, respectively. Regarding previous studies (Table  
107 S3), 0.8% was selected as the vehicle emission factor, considering differences in vehicle  
108 type, fuel composition, and other factors (Kramer et al., 2020;Hao et al., 2020;Huang  
109 et al., 2017).

#### 110 4.2 Homogeneous reaction of NO and •OH

111 The reaction between NO and •OH is the primary gas-phase reaction source of  
112 HONO at high NO concentrations, and the production rate contribution (P<sub>OH+NO</sub>) for this

113 reaction can be calculated as:

$$114 \quad P_{\text{OH}+\text{NO}} = k_{\text{OH}+\text{NO}}[\text{OH}][\text{NO}] \quad (\text{S2})$$

115 where  $k_{\text{OH}+\text{NO}}$  ( $7.2 \times 10^{-12} \text{ cm}^3 \text{ molecule}^{-1} \text{ s}^{-1}$ ) is the rate constant for the reactions at  
116 298K (Li et al., 2012). •OH concentration was simulated according to the empirical  
117 model (Hu et al., 2022;Wang et al., 2025):

$$118 \quad [\text{OH}] = 4.1 \times 10^9 \times \frac{J(\text{O}^1\text{D}) \times J(\text{NO}_2) \times (140 \times [\text{NO}_2] + 1) + [\text{HONO}] \times J(\text{HONO})}{0.41 \times [\text{NO}_2]^2 + 1.7 \times [\text{NO}_2] + 1 + [\text{NO}] \times k_{\text{NO}+\text{OH}} + [\text{HONO}] \times k_{\text{NO}+\text{OH}}} \quad (\text{S3})$$

119 where,  $J(\text{O}^1\text{D})$ ,  $J(\text{NO}_2)$ , and  $J(\text{HONO})$  are the photolysis rates calculated using the  
120 TUV model (v5.2; available at <http://cprm.acom.ucar.edu/Models/TUV/>). The cloud  
121 optical depth value for the TUV model was adjusted so that the predicted UVB radiation  
122 intensity matched the observations (Lyu et al., 2019;Wang et al., 2022). The calculated  
123 •OH concentration varied from  $0.1 \times 10^6$  to  $4 \times 10^6$  molecule/cm<sup>3</sup> at U-ZK and  $0.1 \times$   
124  $10^6$  to  $5 \times 10^6$  molecule/cm<sup>3</sup> t R-PY, which was comparable to the levels in other cities  
125 of North China (Li et al., 2018;Fuchs et al., 2017;Yang et al., 2017). Since there is no  
126 photolysis at night, the •OH concentration was assumed to be  $0.8 \times 10^6$  molecule/cm<sup>3</sup>  
127 (Wang et al., 2022).

## 128 4.3 Heterogeneous conversion of NO<sub>2</sub> to HONO

### 129 4.3.1 Heterogeneous dark reactions

130 The heterogeneous conversion of NO<sub>2</sub> to HONO on the ground ( $P_{\text{ground}}$ ) and on the  
131 aerosol surface ( $P_{\text{aerosol}}$ ) was calculated based on parameters obtained from experiments  
132 or observations.



133 
$$P_{\text{ground}} = \frac{1}{8} \gamma_1 \times [\text{NO}_2] \times C_{\text{NO}_2} \times \frac{S_g}{V} \quad (\text{S4})$$

134 
$$P_{\text{aerosol}} = \frac{1}{4} \gamma_2 \times [\text{NO}_2] \times C_{\text{NO}_2} \times \frac{S_a}{V} \quad (\text{S5})$$

135 
$$\frac{S_g}{V} = \frac{1}{\text{MLH}} \quad (\text{S6})$$

136 
$$C_{\text{NO}_2} = \sqrt{\frac{8RT}{\pi M}} \quad (\text{S7})$$

137 where  $C_{\text{NO}_2}$  is the average molecular velocity of  $\text{NO}_2$  molecule ( $\text{m s}^{-1}$ );  $R$  is the ideal  
 138 gas constant;  $T$  is the temperature (K);  $M$  is the molecular weight of  $\text{NO}_2$  ( $\text{kg mol}^{-1}$ );  
 139  $\text{MLH}$  is the height of the mixed layer, which is determined to be 50 m due to HONO  
 140 formation on the ground level and its short lifetime (Liu et al., 2020a);  $S_a/V$  is the  
 141 surface area to volume ratio of aerosol, estimated by Su et al. (2008).

#### 142 4.3.2 Heterogeneous photo-enhanced reactions

143 The heterogeneous photo-enhanced reactions of  $\text{NO}_2$  on the surface of the ground  
 144 ( $P_{\text{ground} + \text{hv}}$ ) and the surface of the aerosol ( $P_{\text{aerosol} + \text{hv}}$ ) were calculated following (Zhang  
 145 et al., 2020a):

146 
$$P_{\text{ground} + \text{hv}} = \frac{1}{8} \times C_{\text{NO}_2} \times \frac{1}{\text{MLH}} \times \gamma_1 \times \frac{J_{\text{NO}_2}}{J_{\text{NO}_2, \text{noon}}} \times [\text{NO}_2] \quad (\text{S8})$$

147 
$$P_{\text{aerosol} + \text{hv}} = \frac{1}{4} \times C_{\text{NO}_2} \times \frac{S_a}{V} \times \gamma_2 \times \frac{J_{\text{NO}_2}}{J_{\text{NO}_2, \text{noon}}} \times [\text{NO}_2] \quad (\text{S9})$$

148 where  $J_{\text{NO}_2}$  and  $J_{\text{NO}_2, \text{noon}}$  are the photolysis rate of  $\text{NO}_2$  and the photolysis rate of  $\text{NO}_2$   
 149 at noon during the day, respectively.

150  $\gamma_1$  and  $\gamma_2$  are the absorption coefficient of  $\text{NO}_2$  on the ground and aerosol surface,

151 respectively, which is assumed to be  $4 \times 10^{-6}$  (Yu et al., 2022;Zhang et al., 2021;Zhang  
152 et al., 2020a). Moreover, we discuss the uncertainties based on the recommended values  
153 of  $2 \times 10^{-6}$ – $1 \times 10^{-5}$  as upper and lower bounds(Chen et al., 2023;VandenBoer et al.,  
154 2013;Wong et al., 2011). Results show (Figure S3) that the uncertainties for  $P_{\text{ground}}$ ,  
155  $P_{\text{aerosol}}$ ,  $P_{\text{ground+hv}}$ , and  $P_{\text{aerosol+hv}}$  are  $-50\%$  to  $150\%$ ,  $-50\%$  to  $151\%$ ,  $-20\%$  to  $120\%$ , and  
156  $-50\%$  to  $121\%$  at the U-ZK, respectively. At the R-PY, the uncertainties for  $P_{\text{ground}}$ ,  
157  $P_{\text{aerosol}}$ ,  $P_{\text{ground+hv}}$ , and  $P_{\text{aerosol+hv}}$  are  $-50\%$  to  $150\%$ ,  $-50\%$  to  $151\%$ ,  $-20\%$  to  $120\%$ , and  
158  $-20\%$  to  $121\%$ , respectively.

#### 159 4.4 Nitrate photolysis

160 The nitrate photolysis ( $P_{\text{nitrate}}$ ) was calculated based on the measured nitrate  
161 concentration ( $\text{NO}_3^-$ ) from  $\text{PM}_{2.5}$  and nitrate photolysis rate ( $J_{\text{nitrate} \rightarrow \text{HONO}}$ ):

$$162 \quad P_{\text{nitrate}} = J_{\text{nitrate} \rightarrow \text{HONO}} \times [\text{NO}_3^-] \quad (\text{S10})$$

163 where the  $J_{\text{nitrate} \rightarrow \text{HONO}}$  was simulated by normalizing UV values, when the Zenit Angle  
164 is  $0^\circ$ ,  $J_{\text{nitrate} \rightarrow \text{HONO}}$  varied within the range of  $1.22 \times 10^{-5}$  to  $4.84 \times 10^{-4} \text{ s}^{-1}$ , with an average  
165 value of  $8.24 \times 10^{-5} \text{ s}^{-1}$  (Bao et al., 2018).

#### 166 4.5 Soil emissions

167 The emission of HONO from soil is an important source, but the rate is low at lower  
168 temperatures. Zhang et al.(2023) suggests that when the atmospheric temperature is  
169 below  $10^\circ\text{C}$ , the contribution of soil emission to HONO can be disregarded.  
170 Furthermore, calculation results from Liu et al.(2020b), Zhang et al.(2023), and

171 others(Liu et al., 2020a) in the North China Plain during winter all indicate that soil  
 172 emissions only contribute 1% to HONO. During the observation period of U-ZK and  
 173 R-PY sites, the average temperatures of PC and DC were 4°C and 7 °C, and -1°C and  
 174 4 °C, respectively. Therefore, it is likely that soil HONO emissions have a minimal  
 175 impact. Additionally, using a formula to calculate the change in [HONO]\* (defined  
 176 below)(Su et al., 2011) from 3°C to 7°C at U-ZK site in PC and DC is 0.4 ppb, which  
 177 yields a negligible value. Hence, this study does not take it into consideration.

178

$$179 \quad [\text{HONO}]^* = \frac{[\text{H}^+] \cdot [\text{NO}_2^-]}{K_{\text{a.HNO}_2} \cdot H_{\text{HONO}}} = \frac{[\text{HNO}_2] + [\text{NO}_2^-]}{(1 + K_{\text{a.HNO}_2} / [\text{H}^+]) H_{\text{HONO}}} = \frac{[\text{N(III)}]}{(1 + K_{\text{a.HNO}_2} / [\text{H}^+]) H_{\text{HONO}}}$$

180 (S11)

181 where [N(III)] is the total nitrite concentration ( $\text{HNO}_2 + \text{NO}_2^-$ ),  $[\text{H}^+]$  is determined by  
 182 the soil acidity (pH value),  $K_{\text{a.HNO}_2}$  is the acid dissociation constant and  $H_{\text{HONO}}$  is the  
 183 Henry's law coefficient of nitrous acid. Both  $K_{\text{a.HNO}_2}$  and  $H_{\text{HONO}}$  are functions of  
 184 temperature:

$$185 \quad K_{\text{a.HNO}_2}(T) = K_{\text{a.HNO}_2}(298\text{K}) \exp\left(\frac{\Delta H_{\text{a.HNO}_2}}{R} \left(\frac{1}{298} - \frac{1}{T}\right)\right)$$

(S12)

$$186 \quad H_{\text{HONO}}(T) = H_{\text{HONO}}(298\text{K}) \exp\left(\frac{\Delta H_{\text{HONO}}}{R} \left(\frac{1}{298} - \frac{1}{T}\right)\right)$$

(S13)

187 The total nitrite concentration in the aqueous phase of soil, [N(III)], is given by the  
 188 following equation:

$$189 \quad [N(\text{III})] = \frac{\rho_w C_{N(\text{III})}}{\theta_g M_N}$$

(S14)

190 where  $\rho_w$  is the density of water,  $\theta_g$  is the gravimetric soil water content (mass of soil  
 191 water / mass of oven-dry soil),  $M_N = 0.014$  kg / mol is the molar mass of nitrogen, and  
 192  $C_{N(III)}$  is the total nitrite ( $NO_2^- + HNO_2$ ) content of soil expressed as a mass fraction of  
 193 nitrogen in oven-dry soil (kg / kg). Note that in this study the mass of nitrite or nitrous  
 194 acid is generally expressed in terms of nitrogen mass (not total molecular mass). The  $\theta_g$   
 195 for most natural soils varies between  $\sim 0 - 0.4$  kg / kg.

196

### 197 **S5. Estimation of HONO formation rate**

198 The redox reaction of  $NO_2$  with  $SO_2$  ( $R_1$ ) is considered a crucial potential source of  
 199 high concentrations of HONO in Northern China (Wang et al., 2016b; Cheng, 2016):

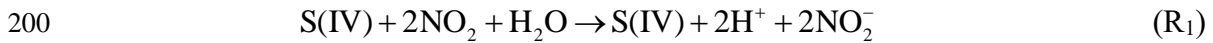

201 The rate expression for the reaction was estimated to:

$$202 \quad d[S(VI)]/dt = k_1[NO_2][S(VI)], \quad (S15)$$

203 where the  $k_1 = (1.4 \times 10^5 + 1.24 \times 10^7)/2 \text{ M}^{-1}\text{s}^{-1}$  for the pH range  $< 5$ ;

204  $k_1 = (23.25 \times (\text{pH} - 5) + 1.4 + 124)/2 \times 10^5 \text{ M}^{-1}\text{s}^{-1}$  for the pH range  $5 < \text{pH} < 5.3$ ;

205  $k_1 = (23.25 \times (\text{pH} - 5) + 1.4 + 12.6 \times (\text{pH} - 5.3) + 124)/2 \times 10^5 \text{ M}^{-1}\text{s}^{-1}$  for the pH range  $5.3 <$   
 206  $\text{pH} < 5.8$ ;

207  $k_1 = (12.6 \times (\text{pH} - 5.3) + 124 + 20)/2 \times 10^5 \text{ M}^{-1}\text{s}^{-1}$  for the pH range  $5.8 < \text{pH} < 8.7$ ;

208 and  $k_1 = (2 \times 10^6 + 1.67 \times 10^7)/2 \text{ M}^{-1}\text{s}^{-1}$  for the pH range  $\text{pH} > 8.7$ . (Seinfeld et al., 1998)

209 In the above calculation formulas, the concentration of gas in the liquid is determined

210 by Henry's constant ( $H^*$ ). The calculation formula is in Table S4.  $SO_2$  has a dissociation  
 211 equilibrium in the solution, producing  $HSO_3^-$  and  $SO_3^{2-}$ . The ionization constants ( $K$ )  
 212 are shown in the following Table S5. The  $H^*$  and  $K$  are temperature-dependent. The  
 213 values are given in Tables S4 and S5 under the condition of 298K, converted to the  
 214 value under the actual temperature using the following calculation formula:

$$215 \quad H(T) \text{ or } K(T) = H(T_{298K}) \text{ or } K(T_{298K}) \exp \left[ -\frac{\Delta H_{298K}}{R} \left( \frac{1}{T} - \frac{1}{298K} \right) \right] \quad (S16)$$

216 where  $H(T)$ ,  $K(T)$ ,  $H(T_{298K})$ , and  $K(T_{298K})$  represent the  $H^*$  and  $K$  at actual temperature  
 217 and 298 K, respectively.

218 Influences of ionic strength on  $R_1$  were not considered because of the high values  
 219 predicted by the ISORROPIA-II model during the sampling periods (Cheng et al.,  
 220 2016). To evaluate the effects of mass transport, the formulation of a standard resistance  
 221 model was adopted:

$$222 \quad \frac{1}{R_{H, \text{aq}}} = \frac{1}{R_{\text{aq}}} + \frac{1}{J_{\text{aq}, \text{lim}}} \quad (S17)$$

223 where  $R_{H, \text{aq}}$  is the sulfate production rate,  $R_{\text{aq}}$  is the aqueous-phase reaction rate and  
 224  $J_{\text{aq}, \text{lim}}$  is the limiting mass transfer rate, which could be calculated by the formulas as  
 225 follows:

$$226 \quad J_{\text{aq}, \text{lim}} = \min \{ J_{\text{aq}}(SO_2), J_{\text{aq}}(X) \} \quad (S18)$$

$$227 \quad J_{\text{aq}}(X) = k_{\text{MT}}(X) \cdot [X] \quad (S19)$$

228 where  $[X]$  refers to the aqueous-phase concentrations of  $SO_2$  or the oxidants  $O_{xi}$   
 229 calculated by the equation in Table S4. The mass transfer rate coefficient  $k_{\text{MT}}(X)$  ( $s^{-1}$ )

230 can be calculated by:

$$231 \quad k_{\text{MT}} = \left[ \frac{R_p^2}{3D_g} + \frac{4R_p}{3\alpha v} \right]^{-1} \quad (\text{S20})$$

232 where  $R_p$  is the aerosol radius,  $D_g$  is the gas-phase molecular diffusion coefficient (0.2

233  $\text{cm}^2 \text{s}^{-1}$  at 293K),  $v$  is the mean molecular speed of X ( $3 \times 10^4 \text{ cm s}^{-1}$ ), and  $a$  is the mass

234 accommodation of X on the droplet surface, and we adopted values of 0.11 and  $2 \times 10^{-4}$  for

235  $\text{SO}_2$  and  $\text{NO}_2$ , respectively referring to Cheng et al. (2016).

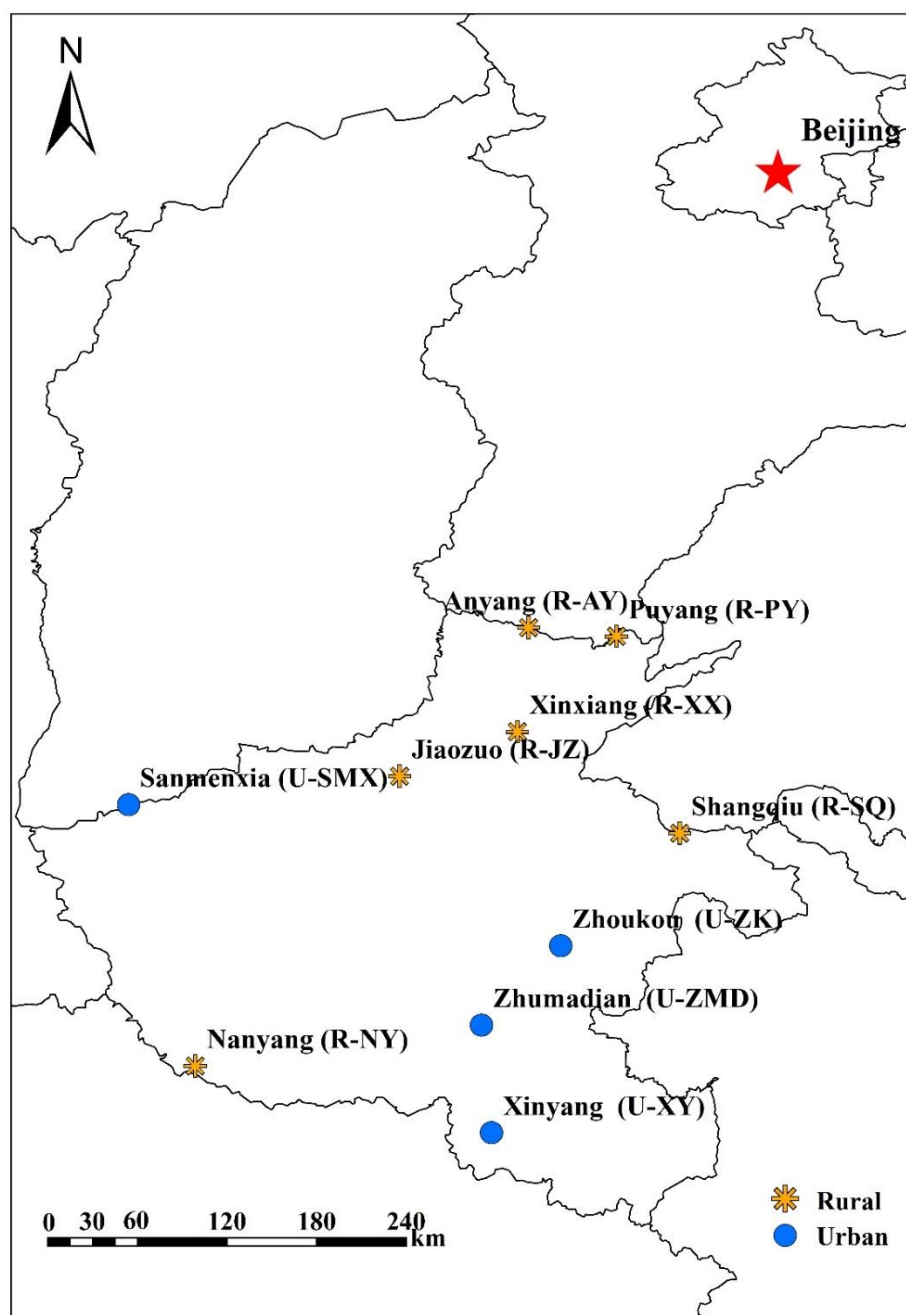

237

238 Figure S1. Sampling point map in Henan Province, China. © 2019 National Geomatics

239 Center of China. i.e., urban sites at Sanmenxia (U-SMX), Zhoukou (U-ZK), Zhuamdian

240 (U-ZMD) and Xinyang (U-XY), rural sites at Anyang (R-AY), Xinxiang (R-XX),

241 Puyang (R-PY), Jiaozuo(R-JZ), Shangqiu (R-SQ) and Nanyang (R-NY). All rights

242 reserved.

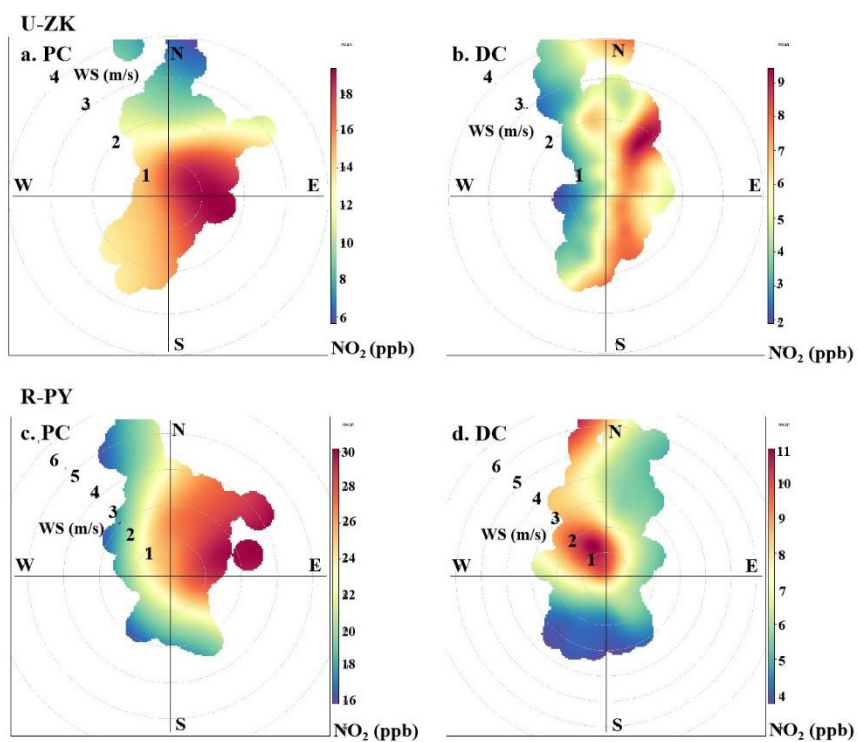

244

245 Figure S2. Result of conditional bivariate probability function plots: NO<sub>2</sub> at U-ZK and  
 246 R-PY sites before (PC) and during (DC) the COVID-19 outbreak. The color scale bar  
 247 represents NO<sub>2</sub> concentration.



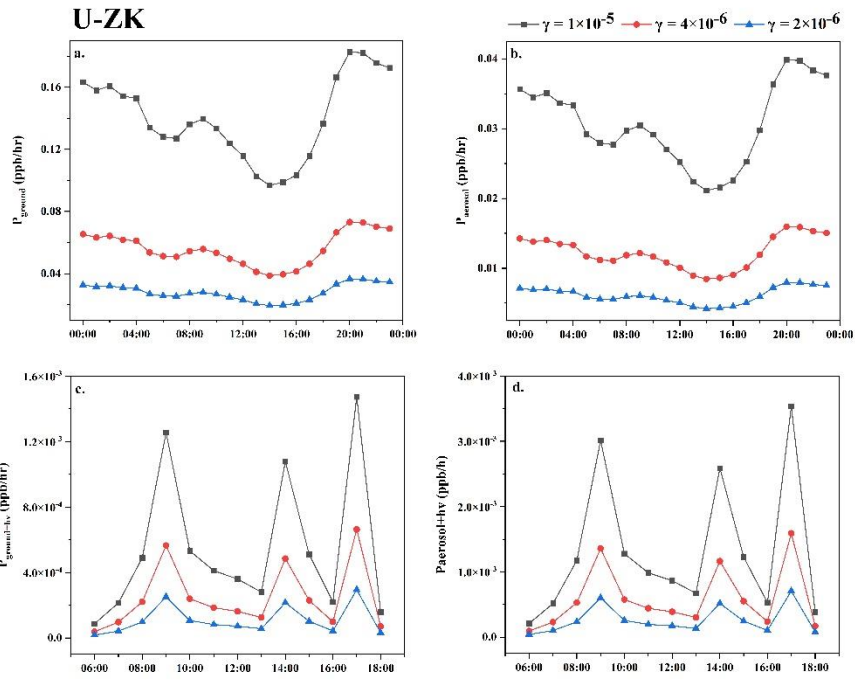

248

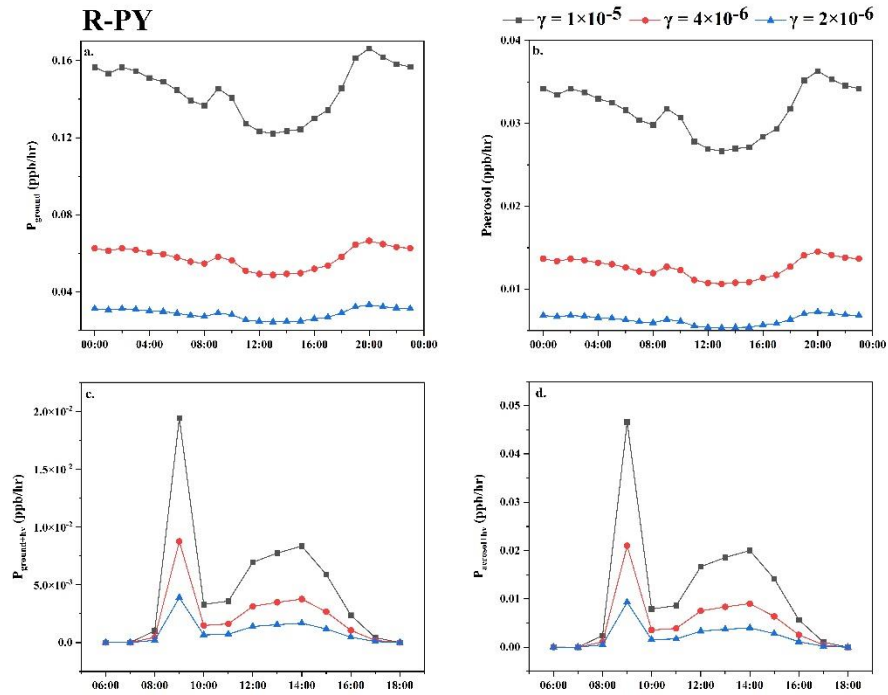

249

250 Figure S3. HONO production rate using different uptake rates of  $\text{NO}_2$  at the U-ZK

251 and R-PY sites before (PC) and during (DC) the COVID-19 outbreak. (a)  $P_{ground}$ , (b)

252  $P_{aerosol}$ , (c)  $P_{ground+hv}$ , and (d)  $P_{aerosol+hv}$

253

**a.U-ZK**

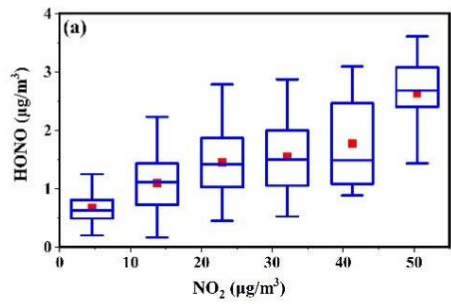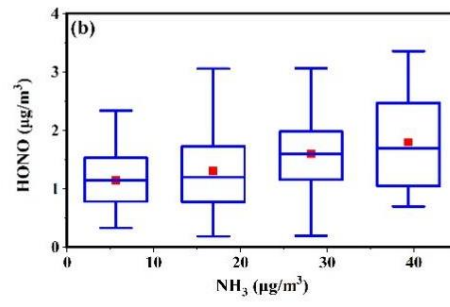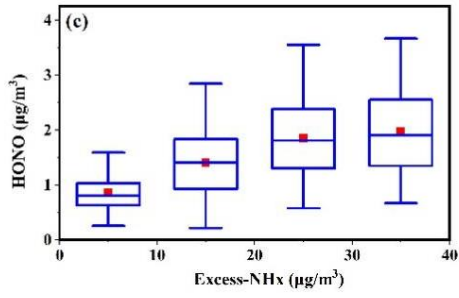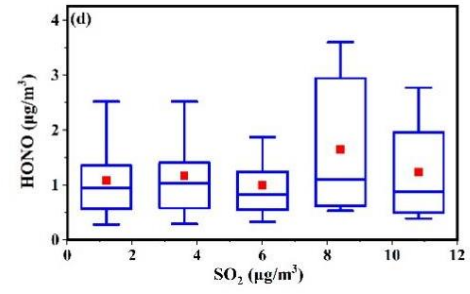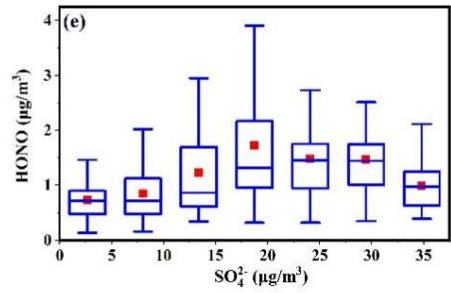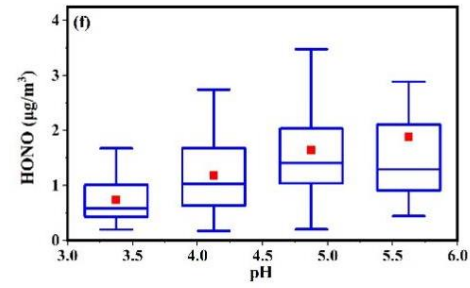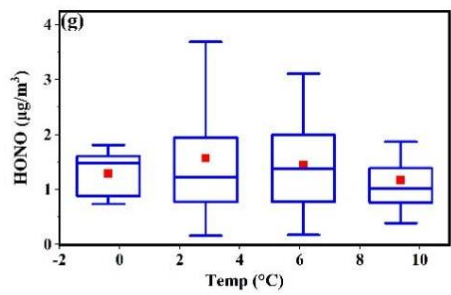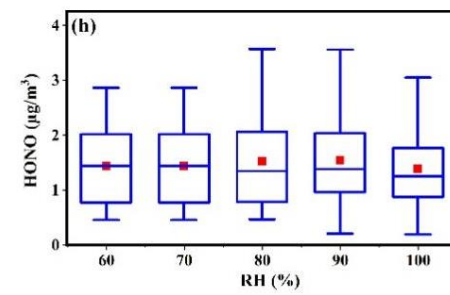

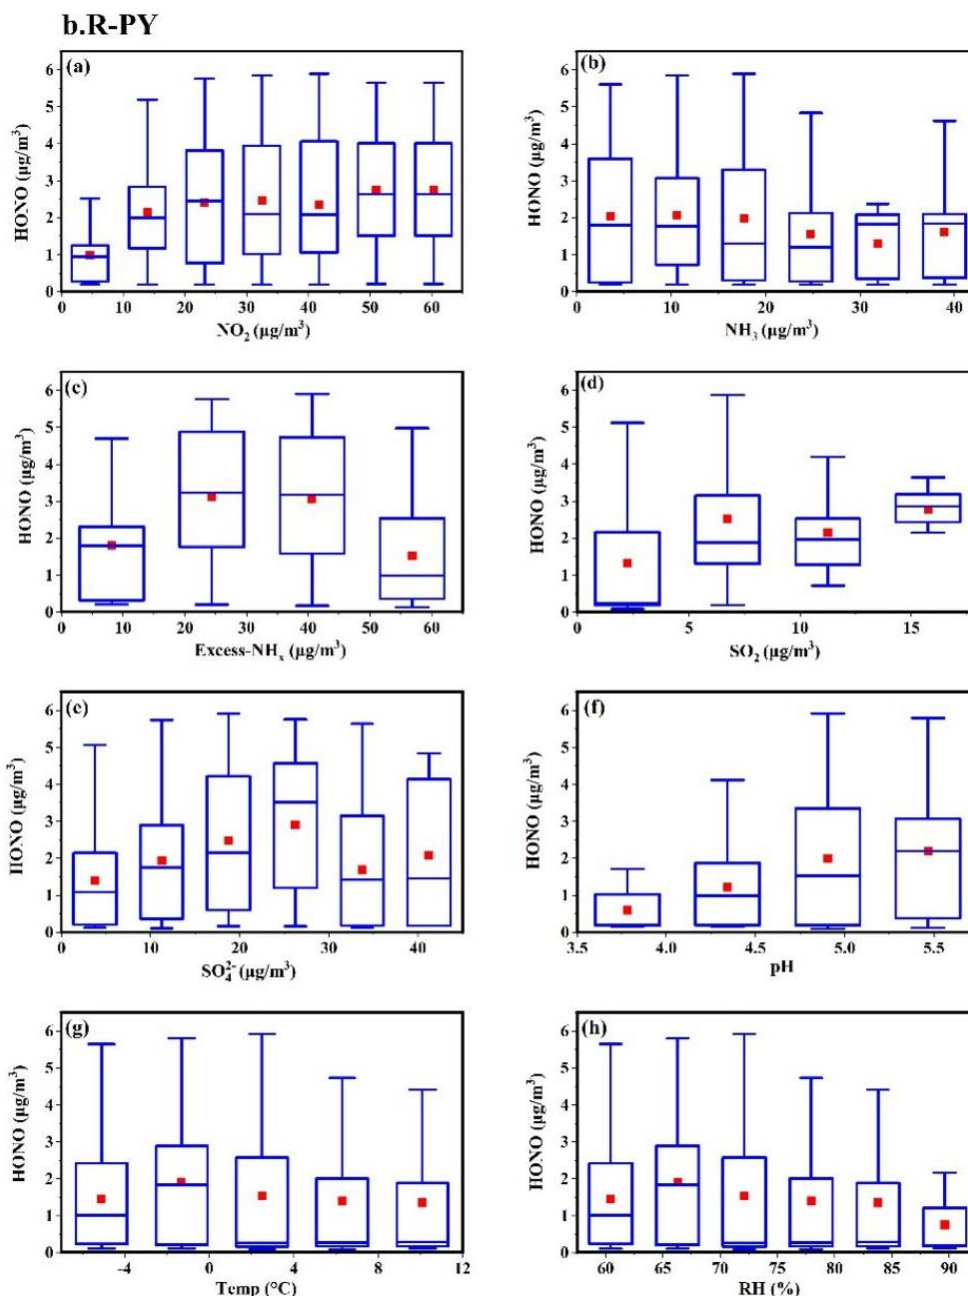

255

256 Figure S4. Relationship between HONO and main influencing factors during (DC) the

257 COVID-19 outbreak at U-ZK and R-PY sites. In each box, the top, middle, and

258 bottom lines represent the 75, 50, and 25 percentiles of statistical data, respectively;

259 the upper and lower whiskers represent the 90 and 10 percentiles of statistical data,

260 respectively.

261

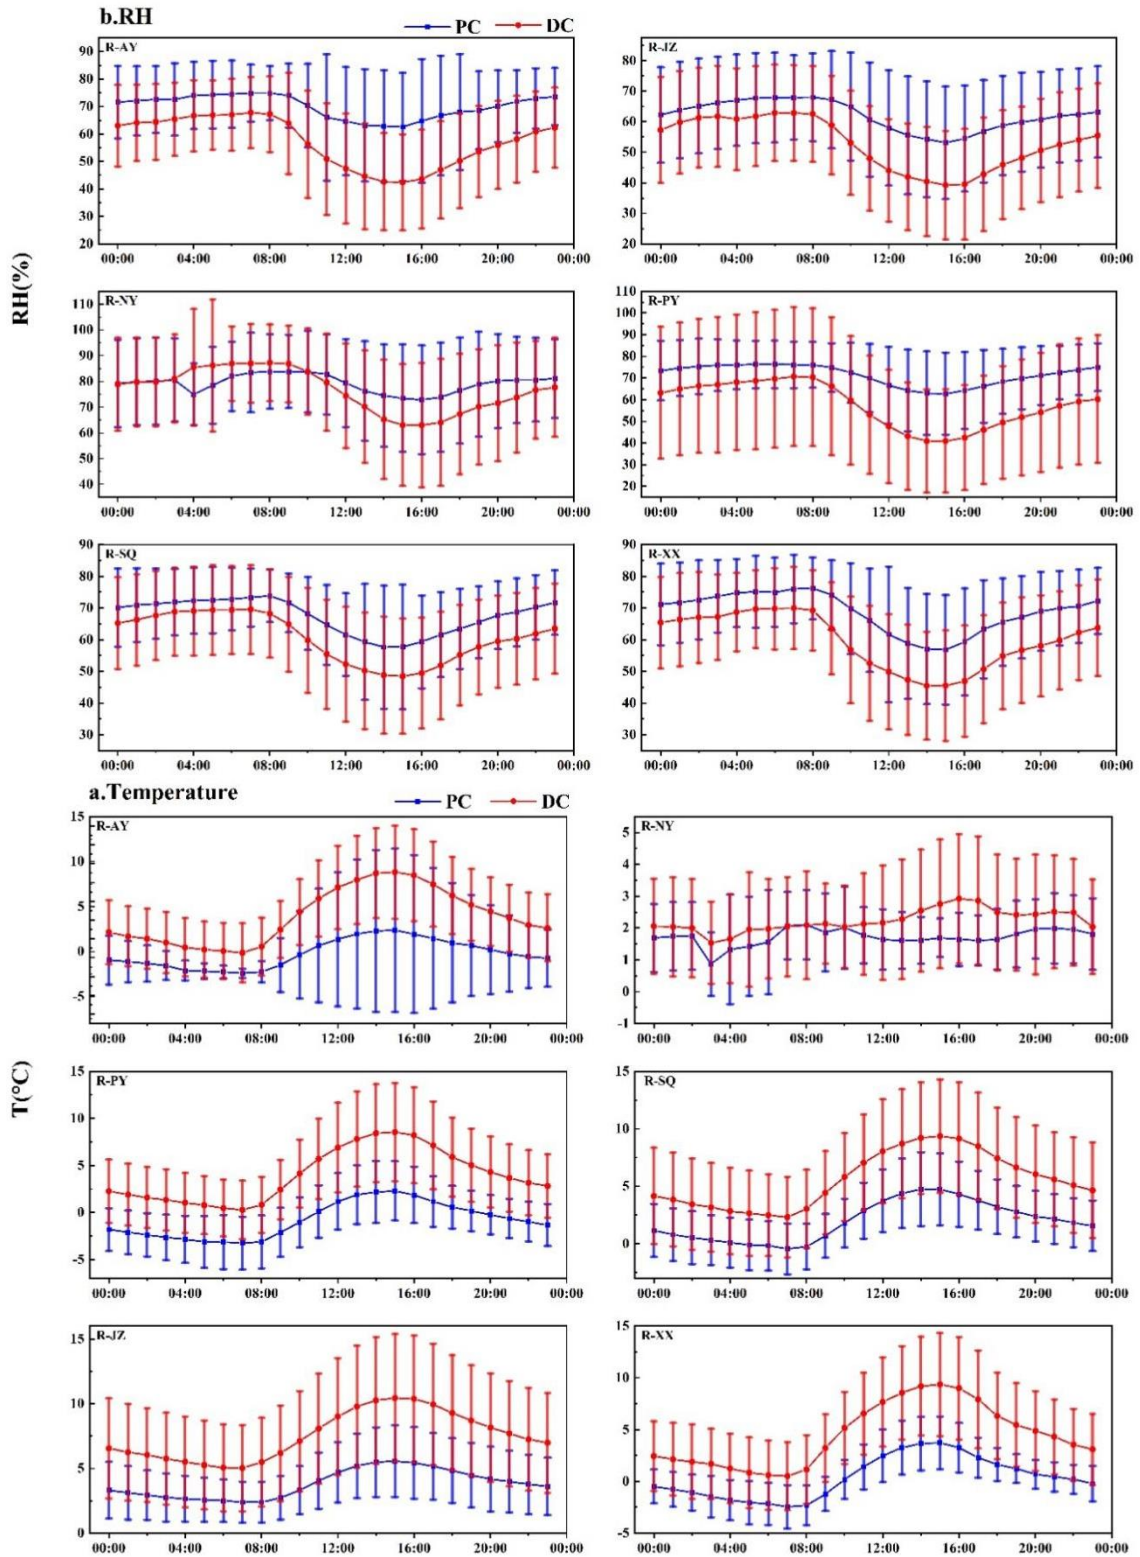

262

263

264

265

266

Figure S5. Daily changes in temperature and relative humidity (RH) in rural sites before (PC) and during (DC) the COVID-19 outbreak, the error bar represents the standard deviation. The upper and lower whiskers represent the standard deviation.

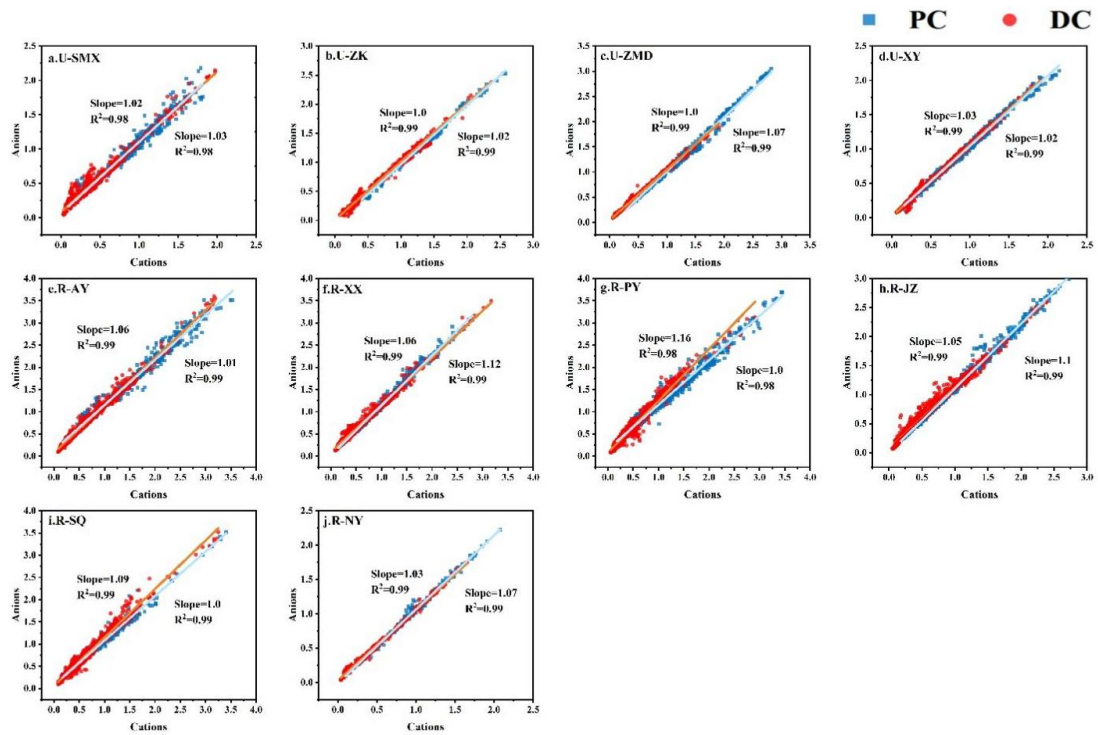

267

268 Figure S6. The equilibrium state of anions and cations at ten sites before (PC) and

269 during (DC) the COVID-19 outbreak.

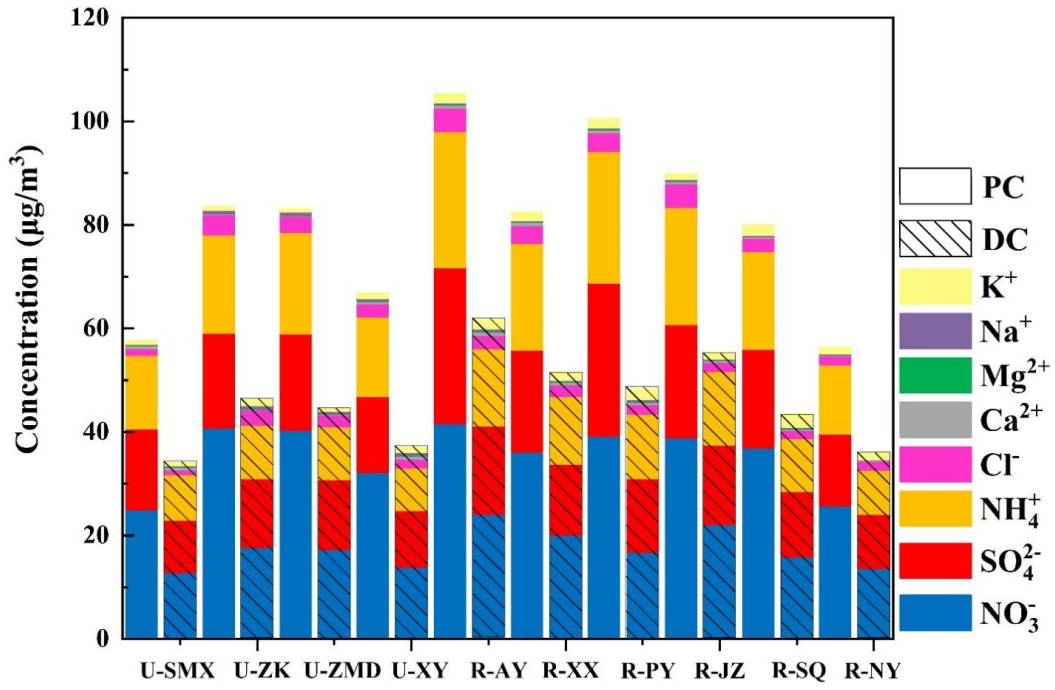

270

271 Figure S7. Concentrations of the water-soluble ions at the ten sites before (PC) and

272 during (DC) the COVID-19 outbreak.



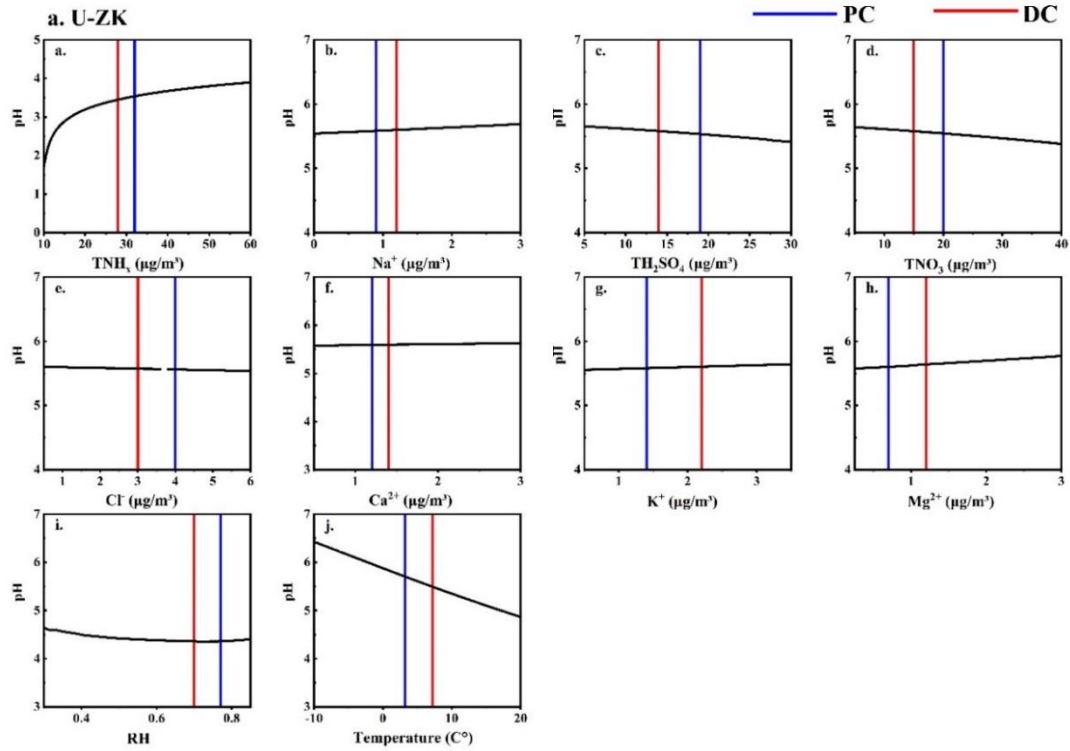

273

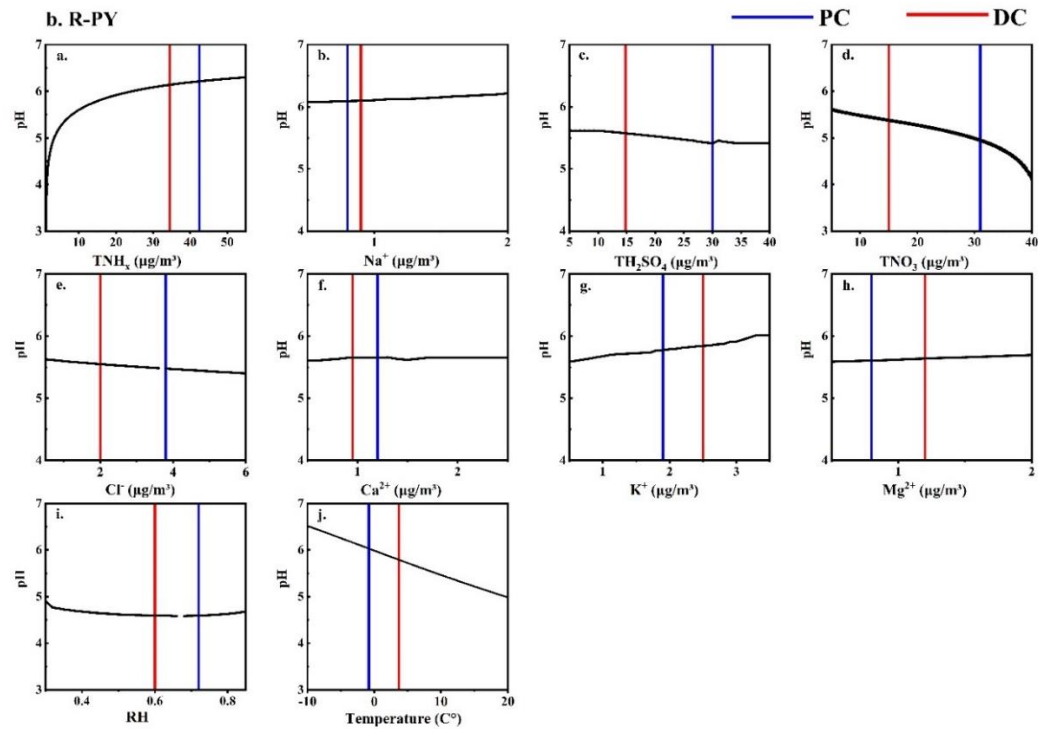

274

275 Figure S8. Sensitivity tests of pH to each factor. The vertical bar represents the mean  
 276 values before (PC) and during (DC) the COVID-19 outbreak. A given range for a  
 277 variable (i.e.,  $\text{TNH}_x$ ) with corresponding average values of other parameters (i.e.,  
 278  $\text{TH}_2\text{SO}_4$ ,  $\text{TNO}_3$ ,  $\text{TCl}$ ,  $\text{TNa}$ ,  $\text{K}^+$ ,  $\text{Ca}^{2+}$ ,  $\text{Mg}^{2+}$ ,  $\text{T}$ , and  $\text{RH}$ ) was simulated to compare its  
 279 effects on pH.

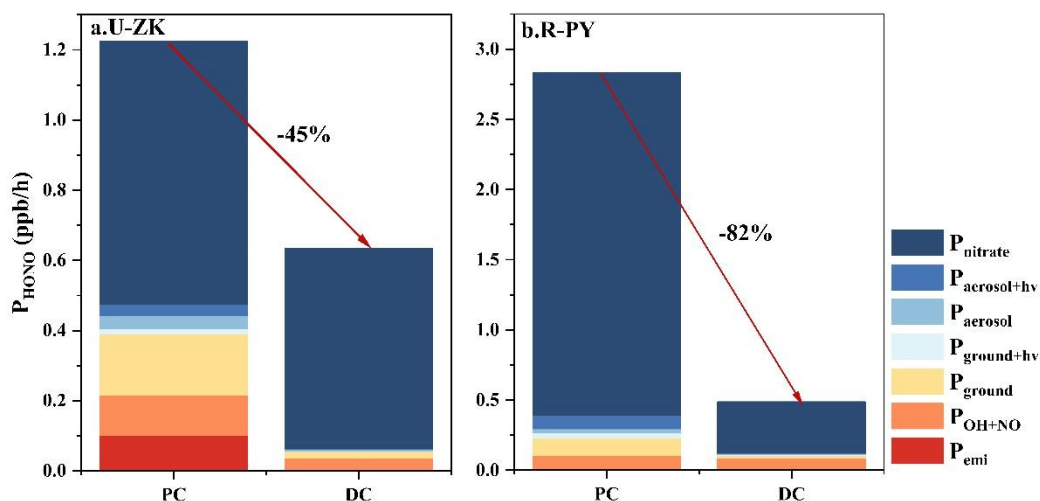

280

281 Figure S9. Maximum uncertainty values for HONO sources at U-ZK and R-PY sites

282 were compared between the pre-COVID-19 outbreak (PC) and (DC) periods. Refer to

283 Text S4 for details on the calculation methods.

284

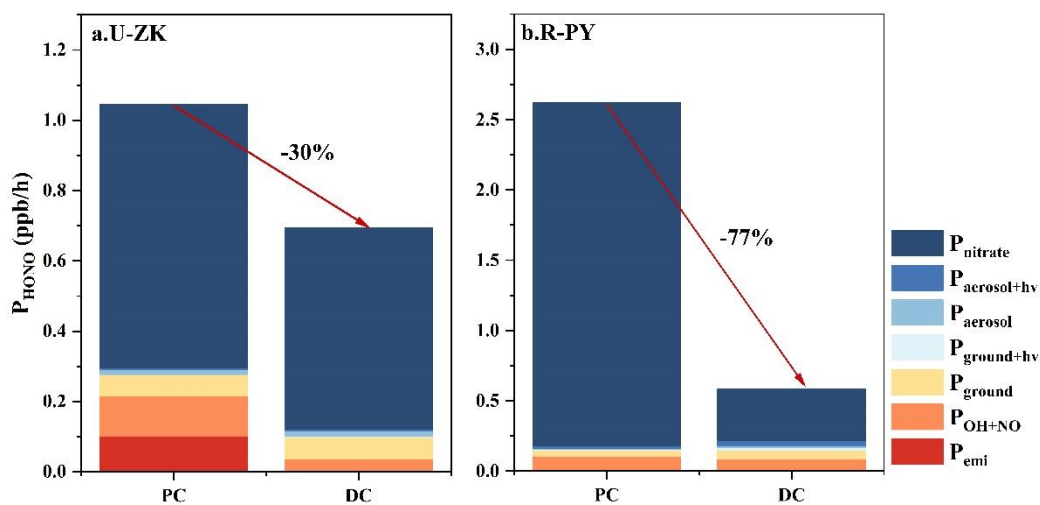

285

286 Figure S10. Minimum uncertainty values for HONO sources at U-ZK and R-PY sites

287 were compared between the pre-COVID-19 outbreak (PC) and (DC) periods. Refer to

288 Text S4 for details on the calculation methods.

289

290



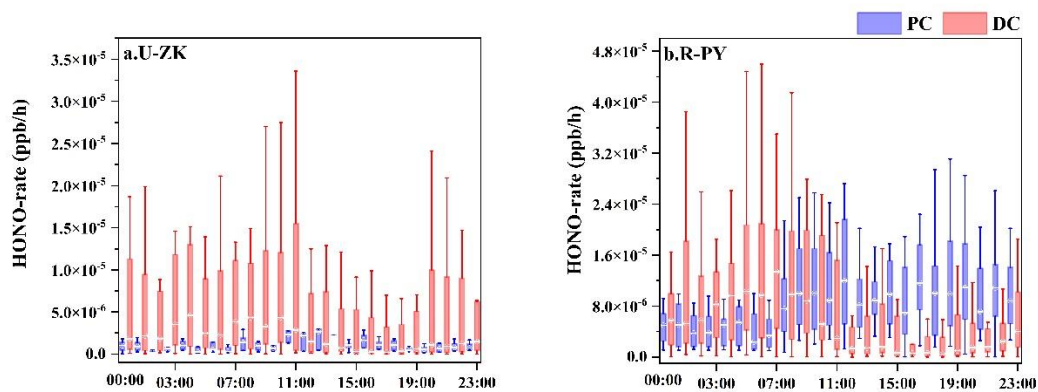

291

292 Figure. S11. HONO production rate through  $R_1$  at U-ZK and R-PY sites before (PC)

293 and during (DC) the COVID-19 outbreak. In each box, the top, middle, and bottom

294 lines represent the 75, 50, and 25 percentiles of statistical data, respectively; the upper

295 and lower whiskers represent the 90 and 10 percentiles of statistical data, respectively.

296

297

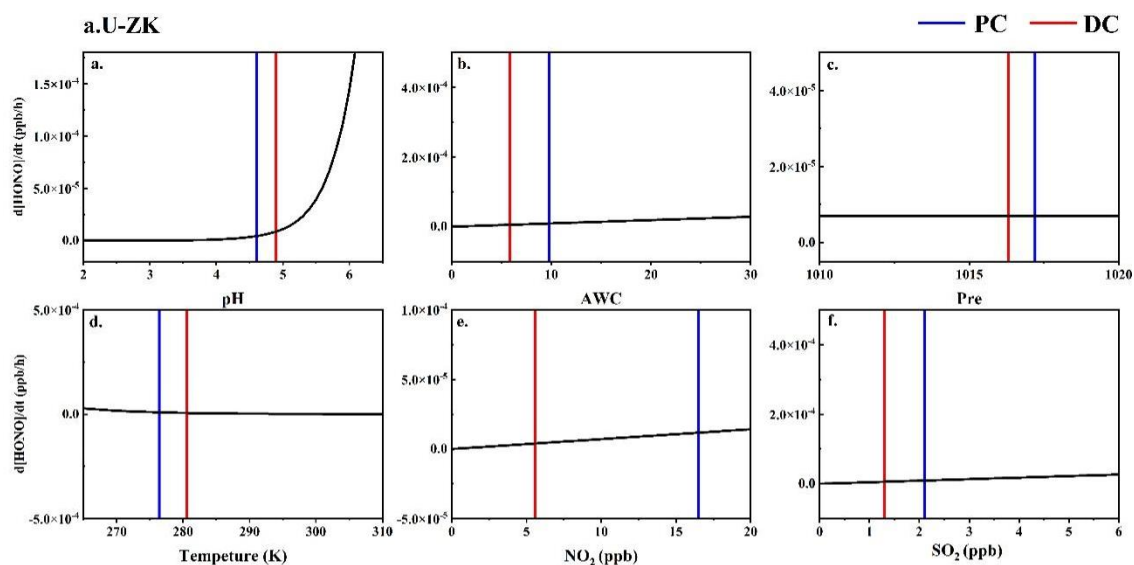

298

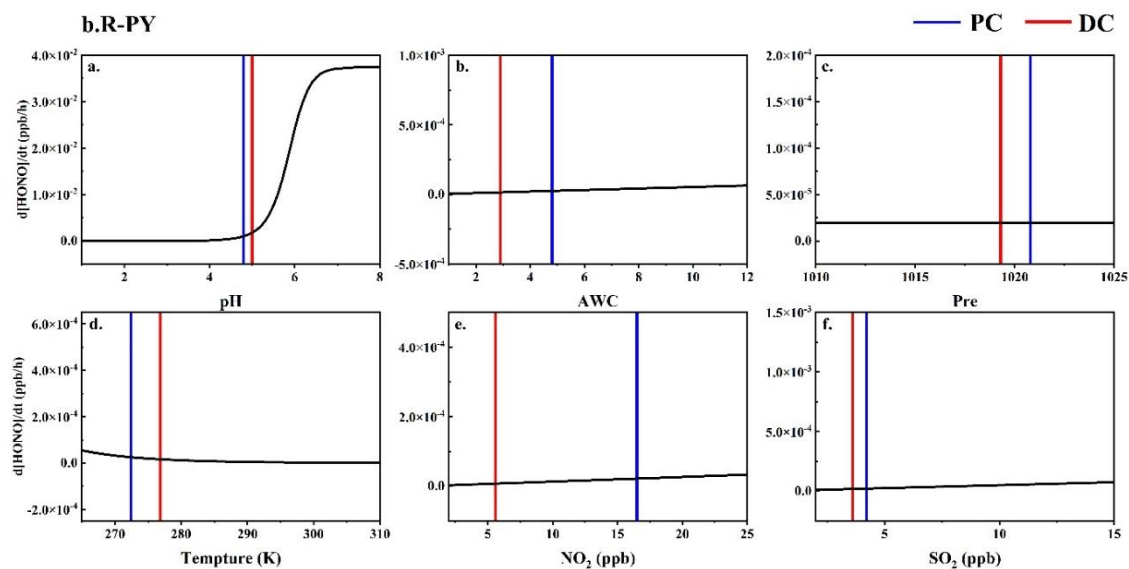

299

300 Figure S12. Sensitivity of HONO product rate to each factor. The vertical bar represents  
 301 the mean values before (PC) and during (DC) the COVID-19 outbreak. The real-time  
 302 measured values of a variable and the average values of other parameters were input  
 303 into the production rate of the  $R_1$  reaction.

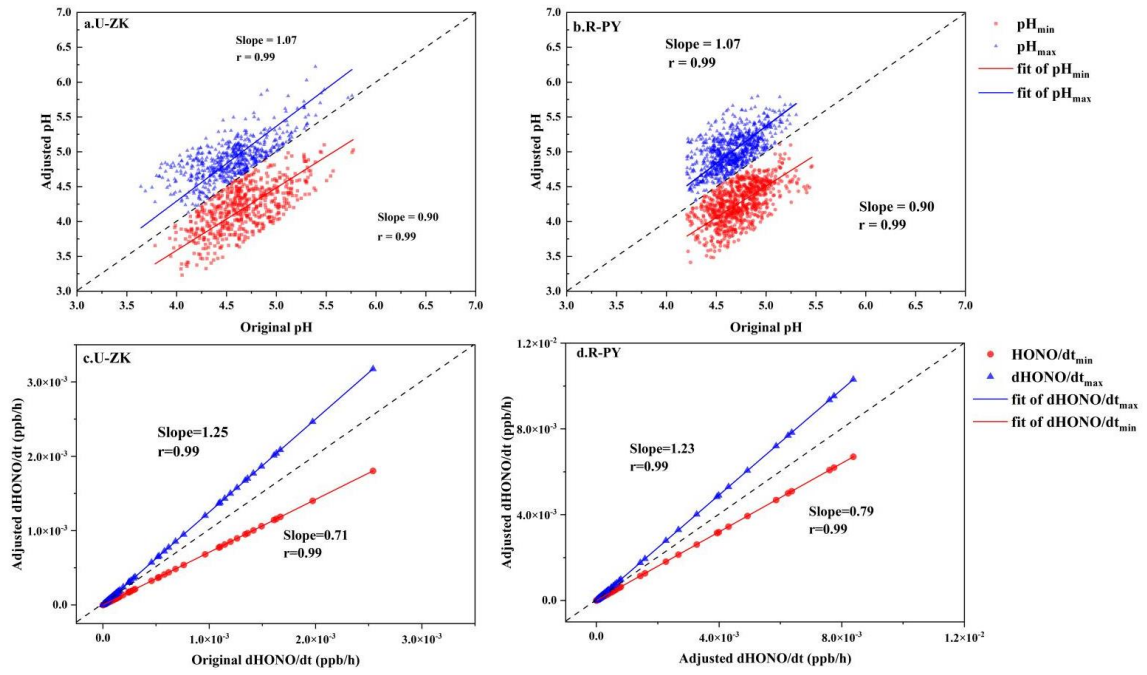

304

305 Figure S13. pH and  $R_1$  uncertainties at the U-ZK and R-PY sites are based on two

306 extreme scenarios of sensitivity to measurement uncertainty.

307

308

309

310

311 **Tables**

312

313

314

315

Table S1. Descriptions of the ten sampling sites in Henan Province, China.

| Observation sites | Classifications | Abbreviations | Coordinates         | Locations                                                                | Surrounding environment                  |
|-------------------|-----------------|---------------|---------------------|--------------------------------------------------------------------------|------------------------------------------|
| Sanmenxia         | Urban site      | U-SMX         | 34.79 °N, 111.16 °E | Sanmenxia Environmental Protection Bureau                                | Roads, residential areas                 |
| Zhoukou           | Urban site      | U-ZK          | 33.65° N, 114.65° E | Chuanhui District People's Government                                    | Roads, residential areas                 |
| Zhumadian         | Urban site      | U-ZMD         | 33.01° N, 114.01° E | Huanghuai College                                                        | Roads, residential areas, shopping malls |
| Xinyang           | Urban site      | U-XY          | 32.14° N, 114.09° E | Xinyang Museum                                                           | Roads, residential areas, shopping malls |
| Anyang            | Rural site      | R-AY          | 36.22°N, 114.39° E  | Baizhuang Town Xindian North Street China Resources Gas (Andan Station)  | Highways, villages, farmland             |
| Xinxiang          | Rural site      | R-XX          | 35.38° N, 114.30° E | Banzao Township Central School in Yanjin County                          | Villages, farmland                       |
| Puyang            | Rural site      | R-PY          | 36.15° N, 115.10° E | Nanle County Longwang Temple Station                                     | Villages, farmland                       |
| Jiaozuo           | Rural site      | R-JZ          | 35.02° N, 113.35° E | The Second River Bureau of Jiefeng Village, Beiguo Township, Wuxi County | Villages, farmland                       |
| Shangqiu          | Rural site      | R-SQ          | 34.56° N, 115.61° E | Liangyuan Huanghe Gudao National Forest Park                             | Highways, villages, farmland             |
| Nanyang           | Rural site      | R-NY          | 32.68° N, 111.70° E | Nanyang Tangshan Park                                                    | Villages, farmland                       |

316

317

Table S2. The value of  $\rho_s$  in other studies.

| Observation site | Period       | $\rho_s$ (g/cm <sup>3</sup> ) | Reference                  |
|------------------|--------------|-------------------------------|----------------------------|
| Beijing          | Dec 2016     | 1.4                           | (Liu et al., 2017)         |
| Tianjin          | Dec-Jun 2015 | 1.3                           | (Shi et al., 2017)         |
| Xi'an            | Nov-Dec 2012 | 1.4                           | (Guo et al., 2017)         |
| Hohhot           | Winter 2015  | 1.35                          | (Wang et al., 2019)        |
| Northeastern USA | Feb-Mar 2015 | 1.4                           | (Guo et al., 2016)         |
| Crete, Greece    | Aug-Nov 2012 | 1.35                          | (Bougiatioti et al., 2016) |
| Alabama, USA     | Jun-Jul 2013 | 1.4                           | (Guo et al., 2015)         |
| Georgia, USA     | Aug-Oct 2016 | 1.4                           | (Nah et al., 2018)         |

318

319

Table S3. Summary of vehicle emission factors.

| Observation site | Period | Emission factor (%) | Reference                     |
|------------------|--------|---------------------|-------------------------------|
| Beijing          | 2020   | 0.79                | (Meng et al., 2020)           |
| Hong Kong        | 2015   | 0.4–1.8             | (Yun et al., 2017)            |
| Hong Kong        | 2011   | 0.5–1.6             | (Xu et al., 2015)             |
| Kiesberg Tunnel  | 2001   | 0.8                 | (Kleffmann et al., 2003)      |
| Kiesberg Tunnel  | 1997   | 0.3–0.8             | (Kurtenbach and Wiesen, 2001) |
| Guangzhou        | 2019   | 1.31                | (Li et al., 2021)             |

320

321

Table S4. Constants for calculating the apparent Henry's constant ( $H^*$ ).

| Equilibrium                                | H (M atm <sup>-1</sup> ) at 298K | $-\Delta H_{298K}/R$ (K) |
|--------------------------------------------|----------------------------------|--------------------------|
| SO <sub>2</sub> (g) ↔ SO <sub>2</sub> (aq) | 1.23                             | 3145.3                   |
| NO <sub>2</sub> (g) ↔ NO <sub>2</sub> (aq) | 1.00E-02                         | 2516.2                   |

322

323

Table S5. Constants for calculating the ionization constants (K).

| Equilibrium                                                                        | K (M) at 298K | $-\Delta H_{298K}/R$ (K) |
|------------------------------------------------------------------------------------|---------------|--------------------------|
| SO <sub>2</sub> ·H <sub>2</sub> O ↔ H <sup>+</sup> + HSO <sub>3</sub> <sup>-</sup> | 1.30E-02      | 1960                     |
| HSO <sub>3</sub> <sup>-</sup> ↔ H <sup>+</sup> + SO <sub>3</sub> <sup>2-</sup>     | 6.60E-08      | 1500                     |

324

325 Table S6. Comparisons of NH<sub>3</sub> concentrations (mean ± standard deviation) (µg/m<sup>3</sup>)  
 326 from studies in other cities.

| Sampling sites         | Seasons | Years         | NH <sub>3</sub><br>(µg/m <sup>3</sup> ) | Sites | References                |
|------------------------|---------|---------------|-----------------------------------------|-------|---------------------------|
| Delhi, India           | Winter  | 2013–<br>2015 | 19.2 ± 3.5                              | Urban | (Saraswati et al., 2019)  |
| Osaka, Japan           | Winter  | 2015          | 1.5 ± 0.7                               | Urban | (Huy et al., 2017)        |
| Toronto, Canada        | Winter  | 2007          | 0.8 ± 0.5                               | Urban | (Hu et al., 2014)         |
| Kanpur, India          | Winter  | 2007          | 21.7 ± 5.8                              | Urban | (Behera and Sharma, 2010) |
| Nanjing                | Winter  | 2014          | 6.7                                     | Urban | (Wang et al., 2016b)      |
| Yangtze River<br>Delta | Winter  | 2019          | 9.3 ± 4.0                               | Urban | (Wang et al., 2021)       |
| Shanghai               | Winter  | 2014          | 2.8 ± 1.0                               | Urban | (Wang et al., 2018)       |
| Tianjin                | Winter  | 2015          | 12.0                                    | Urban | (Shi et al., 2019)        |
| Xi'an                  | Winter  | 2012          | 17.5 ± 9.1                              | Urban | (Wang et al., 2016a)      |
| Fujian                 | Winter  | 2016          | 12.8 ± 4.8                              | Urban | (Wu et al., 2017)         |
| Beijing                | Winter  | 2015          | 15.1 ± 2.9                              | Urban | (Wang et al., 2016a)      |
| Beijing                | Winter  | 2017          | 13.1 ± 1.6                              | Urban | (Zhang et al., 2020b)     |
| Beijing                | Winter  | 2020          | 19.9 ± 3.8                              | Urban | (Zhang et al., 2020b)     |
| Taoyuan                | Winter  | 2017–<br>2018 | 1.7 ± 1.9                               | Urban | (Duan et al., 2021)       |
| Zhengzhou              | Winter  | 2018          | 19.0 ± 4.0                              | Rural | (Wang et al., 2020)       |
| Quzhou                 | Winter  | 2019          | 29.5 ± 2.2                              | Rural | (Feng et al., 2022)       |
| Gucheng                | Winter  | 2016          | 9.3                                     | Rural | (Xu et al., 2019)         |
| Chongming              | Winter  | 2019–<br>2020 | 9.3 ± 4.0                               | Rural | (Lv et al., 2022)         |
| Shanglan               | Winter  | 2017–<br>2018 | 2.5 ± 2.6                               | Rural | (Duan et al., 2021)       |

327

328

329 Table S7. The concentration (mean  $\pm$  standard deviation) of relative humidity (RH),  
 330 temperature (T),  $\epsilon(\text{NH}_4^+)$  at the ten sites before (PC) and during (DC) the COVID-19  
 331 outbreak.

| Sites | Substances                | Total           | PC              | DC              |
|-------|---------------------------|-----------------|-----------------|-----------------|
| U-SMX | RH (%)                    | 54.8 $\pm$ 18.0 | 60.6 $\pm$ 16.5 | 51.2 $\pm$ 18.0 |
|       | T ( $^{\circ}\text{C}$ )  | 5.6 $\pm$ 4.2   | 3.1 $\pm$ 2.1   | 7.0 $\pm$ 4.4   |
|       | $\epsilon(\text{NH}_4^+)$ | 0.43 $\pm$ 0.20 | 0.54 $\pm$ 0.18 | 0.36 $\pm$ 0.18 |
| U-ZK  | RH (%)                    | 70.1 $\pm$ 21.9 | 73.6 $\pm$ 14.5 | 69.4 $\pm$ 22.4 |
|       | T ( $^{\circ}\text{C}$ )  | 6.4 $\pm$ 4.3   | 3.8 $\pm$ 2.3   | 7.0 $\pm$ 4.5   |
|       | $\epsilon(\text{NH}_4^+)$ | 0.43 $\pm$ 0.20 | 0.59 $\pm$ 0.14 | 0.32 $\pm$ 0.17 |
| U-ZMD | RH (%)                    | 74.9 $\pm$ 23.3 | 84.4 $\pm$ 17.8 | 68.9 $\pm$ 24.4 |
|       | T ( $^{\circ}\text{C}$ )  | 5.6 $\pm$ 4.6   | 2.9 $\pm$ 2.7   | 7.4 $\pm$ 4.8   |
|       | $\epsilon(\text{NH}_4^+)$ | 0.48 $\pm$ 0.21 | 0.62 $\pm$ 0.17 | 0.38 $\pm$ 0.18 |
| U-XY  | RH (%)                    | 77.0 $\pm$ 22.1 | 86.7 $\pm$ 13.3 | 74.3 $\pm$ 23.3 |
|       | T ( $^{\circ}\text{C}$ )  | 7.7 $\pm$ 4.5   | 4.7 $\pm$ 2.2   | 8.5 $\pm$ 4.6   |
|       | $\epsilon(\text{NH}_4^+)$ | 0.55 $\pm$ 0.21 | 0.71 $\pm$ 0.14 | 0.45 $\pm$ 0.18 |
| R-AY  | RH (%)                    | 62.2 $\pm$ 17.9 | 70.1 $\pm$ 14.9 | 57.2 $\pm$ 17.8 |
|       | T ( $^{\circ}\text{C}$ )  | 2.6 $\pm$ 0.9   | -0.2 $\pm$ 2.5  | 4.4 $\pm$ 4.7   |
|       | $\epsilon(\text{NH}_4^+)$ | 0.46 $\pm$ 0.17 | 0.57 $\pm$ 0.15 | 0.39 $\pm$ 0.14 |
| R-XX  | RH (%)                    | 63.0 $\pm$ 17.0 | 68.7 $\pm$ 14.6 | 59.5 $\pm$ 17.5 |
|       | T ( $^{\circ}\text{C}$ )  | 2.9 $\pm$ 4.6   | 0.3 $\pm$ 2.8   | 4.4 $\pm$ 4.8   |
|       | $\epsilon(\text{NH}_4^+)$ | 0.40 $\pm$ 0.17 | 0.52 $\pm$ 0.16 | 0.35 $\pm$ 0.14 |
| R-PY  | RH (%)                    | 63.6 $\pm$ 18.0 | 71.5 $\pm$ 14.6 | 57.6 $\pm$ 18.0 |
|       | T ( $^{\circ}\text{C}$ )  | 1.7 $\pm$ 4.8   | -0.8 $\pm$ 3.2  | 3.6 $\pm$ 4.9   |
|       | $\epsilon(\text{NH}_4^+)$ | 0.43 $\pm$ 0.17 | 0.58 $\pm$ 0.13 | 0.34 $\pm$ 0.13 |
| R-JZ  | RH (%)                    | 56.3 $\pm$ 18.5 | 62.0 $\pm$ 16.7 | 52.8 $\pm$ 18.7 |
|       | T ( $^{\circ}\text{C}$ )  | 4.1 $\pm$ 4.4   | 1.7 $\pm$ 2.6   | 5.6 $\pm$ 4.7   |
|       | $\epsilon(\text{NH}_4^+)$ | 0.37 $\pm$ 0.14 | 0.46 $\pm$ 0.13 | 0.32 $\pm$ 0.13 |
| R-SQ  | RH (%)                    | 63.2 $\pm$ 15.6 | 67.5 $\pm$ 12.6 | 60.5 $\pm$ 17.0 |
|       | T ( $^{\circ}\text{C}$ )  | 4.2 $\pm$ 4.5   | 2.0 $\pm$ 2.9   | 5.6 $\pm$ 4.7   |
|       | $\epsilon(\text{NH}_4^+)$ | 0.45 $\pm$ 0.19 | 0.63 $\pm$ 0.12 | 0.35 $\pm$ 0.14 |
| R-NY  | RH (%)                    | 75.9 $\pm$ 19.1 | 79.3 $\pm$ 17.7 | 73.9 $\pm$ 19.6 |
|       | T ( $^{\circ}\text{C}$ )  | 5.7 $\pm$ 3.8   | 3.6 $\pm$ 2.6   | 6.9 $\pm$ 3.9   |
|       | $\epsilon(\text{NH}_4^+)$ | 0.59 $\pm$ 0.19 | 0.73 $\pm$ 0.12 | 0.52 $\pm$ 0.18 |

332

333 Table S8. The concentration (mean  $\pm$  standard deviation) of required ammonia  
 334 (Required-NH<sub>x</sub>) and excess ammonia (Excess-NH<sub>x</sub>) at the ten sites before (PC) and  
 335 during (DC) the COVID-19 outbreak.

| Sites | Substances                            | Total ( $\mu\text{g}/\text{m}^3$ ) | PC ( $\mu\text{g}/\text{m}^3$ ) | DC ( $\mu\text{g}/\text{m}^3$ ) |
|-------|---------------------------------------|------------------------------------|---------------------------------|---------------------------------|
| U-SMX | Required-NH <sub>4</sub> <sup>+</sup> | 9.1 $\pm$ 7.1                      | 12.7 $\pm$ 7.1                  | 7.0 $\pm$ 6.2                   |
|       | Excess-NH <sub>4</sub> <sup>+</sup>   | 14.7 $\pm$ 11.2                    | 13.6 $\pm$ 10.4                 | 15.3 $\pm$ 11.6                 |
| U-ZK  | Required-NH <sub>4</sub> <sup>+</sup> | 15.2 $\pm$ 9.6                     | 21.4 $\pm$ 8.6                  | 11.6 $\pm$ 8.4                  |
|       | Excess-NH <sub>4</sub> <sup>+</sup>   | 14.6 $\pm$ 8.3                     | 11.9 $\pm$ 6.0                  | 16.1 $\pm$ 9.0                  |
| U-ZMD | Required-NH <sub>4</sub> <sup>+</sup> | 13.9 $\pm$ 9.8                     | 19.4 $\pm$ 9.8                  | 10.4 $\pm$ 8.0                  |
|       | Excess-NH <sub>4</sub> <sup>+</sup>   | 12.8 $\pm$ 8.7                     | 11.6 $\pm$ 8.2                  | 13.6 $\pm$ 8.8                  |
| U-XY  | Required-NH <sub>4</sub> <sup>+</sup> | 10.2 $\pm$ 7.5                     | 14.6 $\pm$ 7.3                  | 7.4 $\pm$ 6.2                   |
|       | Excess-NH <sub>4</sub> <sup>+</sup>   | 7.8 $\pm$ 4.6                      | 6.5 $\pm$ 4.4                   | 8.7 $\pm$ 4.5                   |
| R-AY  | Required-NH <sub>4</sub> <sup>+</sup> | 17.1 $\pm$ 12.4                    | 23.9 $\pm$ 13.4                 | 12.8 $\pm$ 9.5                  |
|       | Excess-NH <sub>4</sub> <sup>+</sup>   | 21.2 $\pm$ 9.4                     | 20.2 $\pm$ 9.2                  | 21.9 $\pm$ 9.4                  |
| R-XX  | Required-NH <sub>4</sub> <sup>+</sup> | 13.5 $\pm$ 9.6                     | 18.0 $\pm$ 9.8                  | 10.7 $\pm$ 8.2                  |
|       | Excess-NH <sub>4</sub> <sup>+</sup>   | 23.3 $\pm$ 11.4                    | 19.6 $\pm$ 10.8                 | 25.6 $\pm$ 11.2                 |
| R-PY  | Required-NH <sub>4</sub> <sup>+</sup> | 13.8 $\pm$ 11.0                    | 22.1 $\pm$ 12.5                 | 9.3 $\pm$ 6.6                   |
|       | Excess-NH <sub>4</sub> <sup>+</sup>   | 22.3 $\pm$ 10.8                    | 17.5 $\pm$ 8.6                  | 25.0 $\pm$ 11.0                 |
| R-JZ  | Required-NH <sub>4</sub> <sup>+</sup> | 15.4 $\pm$ 10.4                    | 20.3 $\pm$ 10.6                 | 12.5 $\pm$ 9.1                  |
|       | Excess-NH <sub>4</sub> <sup>+</sup>   | 27.5 $\pm$ 12.9                    | 26.0 $\pm$ 13.1                 | 28.4 $\pm$ 12.7                 |
| R-SQ  | Required-NH <sub>4</sub> <sup>+</sup> | 13.2 $\pm$ 9.1                     | 19.1 $\pm$ 8.9                  | 9.9 $\pm$ 7.3                   |
|       | Excess-NH <sub>4</sub> <sup>+</sup>   | 15.1 $\pm$ 8.6                     | 10.1 $\pm$ 5.4                  | 17.9 $\pm$ 8.7                  |
| R-NY  | Required-NH <sub>4</sub> <sup>+</sup> | 9.9 $\pm$ 6.6                      | 13.0 $\pm$ 6.9                  | 8.1 $\pm$ 5.8                   |
|       | Excess-NH <sub>4</sub> <sup>+</sup>   | 6.0 $\pm$ 3.6                      | 4.4 $\pm$ 3.3                   | 6.9 $\pm$ 3.4                   |

336



337 Table S9. Comparison of the particle pH values in this study (PC/DC) and other sites  
 338 (mean or mean  $\pm$  standard).

|          | Sites     | Periods           | pH                        | References          |
|----------|-----------|-------------------|---------------------------|---------------------|
| Urban    | Sanmenxia | Jan–Feb 2020      | $4.6 \pm 0.5/4.8 \pm 0.9$ | This study          |
|          | Zhoukou   | Jan–Feb 2020      | $4.6 \pm 0.6/5.1 \pm 0.4$ |                     |
|          | Zhumadian | Jan–Feb 2020      | $4.6 \pm 0.3/4.8 \pm 1.2$ |                     |
|          | Xinyang   | Jan–Feb 2020      | $4.2 \pm 0.3/4.6 \pm 1.3$ |                     |
| Rural    | Anyang    | Jan–Feb 2020      | $4.5 \pm 0.4/4.6 \pm 0.8$ |                     |
|          | Xinxiang  | Jan–Feb 2020      | $4.8 \pm 0.5/4.9 \pm 0.9$ |                     |
|          | Puyang    | Jan–Feb 2020      | $4.8 \pm 0.3/5.1 \pm 0.9$ |                     |
|          | Jiaozuo   | Jan–Feb 2020      | $4.9 \pm 0.5/5.1 \pm 0.8$ |                     |
|          | Shangqiu  | Jan–Feb 2020      | $4.5 \pm 0.3/4.7 \pm 0.8$ |                     |
|          | Nanyang   | Jan–Feb 2020      | $4.2 \pm 0.5/4.4 \pm 0.7$ |                     |
| Urban    | Beijing   | Jan–Feb 2015      | 4.5                       | (Guo et al., 2017)  |
|          | Beijing   | Dec 2016          | $4.3 \pm 0.4$             | (Liu et al., 2017)  |
|          | Beijing   | Feb 2017          | $4.5 \pm 0.7$             | (Ding et al., 2019) |
|          | Tianjin   | Dec–Jun 2015      | $4.9 \pm 1.4$             | (Shi et al., 2017)  |
|          | Tianjin   | Aug 2015          | $3.4 \pm 0.5$             | (Shi et al., 2019)  |
|          | Hohhot    | Winter            | 5.7                       | (Wang et al., 2019) |
|          | Mt. Tai   | Summer            | $2.9 \pm 0.5$             | (Liu et al., 2021b) |
|          | Taoyuan   | Nov 2017–Jan 2018 | $5.1 \pm 1.0$             | (Duan et al., 2021) |
|          | Zhengzhou | Jan 2018          | 4.5                       | (Wang et al., 2020) |
|          | Anyang    | Jan 2018          | 4.8                       | (Wang et al., 2020) |
| Mountain | Mt. Tai   | Summer            | $3.6 \pm 0.7$             | (Liu et al., 2021b) |
| Rural    | Shanglan  | Nov 2017–Jan 2018 | $5.5 \pm 1.1$             | (Duan et al., 2021) |

339

## References

- Behera, S. N., and Sharma, M.: Investigating the potential role of ammonia in ion chemistry of fine particulate matter formation for an urban environment, *Sci. Total Environ.*, 408, 3569–3575, <https://doi.org/10.1016/j.scitotenv.2010.04.017>, 2010.
- Bougiatioti, A., Nikolaou, P., Stavroulas, I., Kouvarakis, G., Weber, R., Nenes, A., Kanakidou, M., and Mihalopoulos, N.: Particle water and pH in the eastern Mediterranean: source variability and implications for nutrient availability, *Atmos. Chem. Phys.*, 16, 4579–4591, <https://doi.org/10.5194/acp-16-4579-2016>, 2016.
- Burling, I. R., Yokelson, R. J., Griffith, D. W. T., Johnson, T. J., Veres, P., Roberts, J. M., Warneke, C., Urbanski, S. P., Reardon, J., Weise, D. R., Hao, W. M., and de Gouw, J.: Laboratory measurements of trace gas emissions from biomass burning of fuel types from the southeastern and southwestern United States, *Atmos. Chem. Phys.*, 10, 11115–11130, <https://doi.org/10.5194/acp-10-11115-2010>, 2010.
- Chen, D., Zhou, L., Liu, S., Lian, C., Wang, W., Liu, H., Li, C., Liu, Y., Luo, L., Xiao, K., Chen, Y., Qiu, Y., Tan, Q., Ge, M., and Yang, F.: Primary sources of HONO vary during the daytime: Insights based on a field campaign, *Sci. Total Environ.*, 903, <https://doi.org/10.1016/j.scitotenv.2023.166605>, 2023.
- Cheng, Y., Zheng, G., Wei, C., Mu, Q., Zheng, B., Wang, Z., Gao, M., Z., Q., He, K., Carmichael, G., Pöschl, U., and Su, and H.: Reactive nitrogen chemistry in aerosol water as a source of sulfate during haze events in China, *Sci. Adv.*, 2, e1601530., <https://doi.org/10.1126/sciadv.1601530>, 2019.
- Ding, J., Zhao, P., Su, J., Dong, Q., Du, X., and Zhang, Y.: Aerosol pH and its driving factors in Beijing, *Atmos. Chem. Phys.* 19, 7939–7954, <https://doi.org/10.5194/acp-19-7939-2019>, 2019.
- Duan, X., Yan, Y., Peng, L., Xie, K., Hu, D., Li, R., and Wang, C.: Role of ammonia in secondary inorganic aerosols formation at an ammonia-rich city in winter in North China: A

- comparative study among industry, urban, and rural sites, *Environ. Pollut.*, 291, 118151, <https://doi.org/10.1016/j.envpol.2021.118151>, 2021.
- Feng, S., Xu, W., Cheng, M., Ma, Y., Wu, L., Kang, J., Wang, K., Tang, A., Collett, J. L., Fang, Y., Goulding, K., Liu, X., and Zhang, F.: Overlooked nonagricultural and wintertime agricultural NH<sub>3</sub> emissions in Quzhou county, North China Plain: evidence from <sup>15</sup>N-Stable Isotopes. *Environ. Sci. Technol. Lett.*, 9, 127–133, <https://doi.org/10.1021/acs.estlett.1c00935>, 2022.
- Fuchs, H., Tan, Z., Lu, K., Bohn, B., Broch, S., Brown, S. S., Dong, H., Gomm, S., Häsel, R., He, L., Hofzumahaus, A., Holland, F., Li, X., Liu, Y., Lu, S., Min, K.-E., Rohrer, F., Shao, M., Wang, B., Wang, M., Wu, Y., Zeng, L., Zhang, Y., Wahner, A., and Zhang, Y.: OH reactivity at a rural site (Wangdu) in the North China Plain: contributions from OH reactants and experimental OH budget, *Atmos. Chem. Phys.*, 17, 645–661, <https://doi.org/10.5194/acp-17-645-2017>, 2017.
- Guo, H., Xu, L., Bougiatioti, A., Cerully, K. M., Capps, S. L., Hite, J. R., Carlton, A. G., Lee, S. H., Bergin, M. H., Ng, N. L., Nenes, A., and Weber, R. J.: Fine-particle water and pH in the southeastern United States, *Atmos. Chem. Phys.*, 15, 5211–5228, <https://doi.org/10.5194/acp-15-5211-2015>, 2015.
- Guo, H., Sullivan, A. P., Campuzano-Jost, P., Schroder, J. C., Lopez-Hilfiker, F. D., Dibb, J. E., Jimenez, J. L., Thornton, J. A., Brown, S. S., Nenes, A., and Weber, R. J.: Fine particle pH and the partitioning of nitric acid during winter in the northeastern United States, *J. Geophys. Res.: Atmos.*, 121, <https://doi.org/10.1002/2016jd025311>, 2016.
- Guo, H., Weber, R. J., and Nenes, A.: High levels of ammonia do not raise fine particle pH sufficiently to yield nitrogen oxide-dominated sulfate production, *Sci. Rep.*, 7, 12109, <https://doi.org/10.1038/s41598-017-11704-0>, 2017.
- Hao, Q., Jiang, N., Zhang, R., Yang, L., and Li, S.: Characteristics, sources, and reactions of nitrous acid during winter at an urban site in the Central Plains Economic Region in China, *Atmos. Chem. Phys.* 20, 7087–7102, <https://doi.org/10.5194/acp-20-7087-2020>, 2020.

- Hu, B., Duan, J., Hong, Y., Xu, L., Li, M., Bian, Y., Qin, M., Fang, W., Xie, P., and Chen, J.: Exploration of the atmospheric chemistry of nitrous acid in a coastal city of southeastern China: results from measurements across four seasons, *Atmos. Chem. Phys.*, 22, 371–393, <https://doi.org/10.5194/acp-22-371-2022>, 2022.
- Hu, Q., Zhang, L., Evans, G. J., and Yao, X.: Variability of atmospheric ammonia related to potential emission sources in downtown Toronto, Canada, *Atmos. Environ.*, 99, 365–373, <https://doi.org/10.1016/j.atmosenv.2014.10.006>, 2014.
- Huang, R., Yang, L., Cao, J., Wang, Q., Tie, X., Ho, K., Shen, Z., Zhang, R., Li, G., Zhu, C., Zhang, N., Dai, W., Zhou, J., Liu, S., Chen, Y., Chen, J., and O'Dowd, C. D.: Concentration and sources of atmospheric nitrous acid (HONO) at an urban site in Western China, *Sci. Total. Environ.*, 02, 165–172. <https://doi.org/10.1016/j.scitotenv.2017.02.166>, 2017.
- Huy, D. H., Thanh, L. T., Hien, T. T., Noro, K., and Takenaka, N.: Characteristics of ammonia gas and fine particulate ammonium from two distinct urban areas: Osaka, Japan, and Ho Chi Minh City, Vietnam, *Environ. Sci. Pollut. Res. Int.*, 24, 8147–8163, <https://doi.org/10.1007/s11356-017-8496-5>, 2017.
- Kleffmann, J., Kurtenbach, R., Lörzer, J., Wiesen, P., Kalthoff, N., Vogel, B., and Vogel, H.: Measured and simulated vertical profiles of nitrous acid—Part I: Field measurements, *Atmos. Environ.*, 37, 2949–2955, [https://doi.org/10.1016/S1352-2310\(03\)00242-5](https://doi.org/10.1016/S1352-2310(03)00242-5), 2003.
- Kramer, L. J., Crilley, L. R., Adams, T. J., Ball, S. M., Pope, F. D., and Bloss, W. J.: Nitrous acid (HONO) emissions under real-world driving conditions from vehicles in a UK road tunnel, *Atmos. Chem. Phys.*, 20, 5231–5248, <https://doi.org/10.5194/acp-20-5231-2020>, 2020.
- Kurtenbach, R., Becker, K.H., Gomes, J.A.G., Kleffmann, J., Lorzer, J.C., Spittler, M., 510, and Wiesen, P., Ackermann, R., Geyer, A., Platt, U.: Investigations of emissions and heterogeneous formation of HONO in a road traffic tunnel, *Atmos. Environ.*, 35, 3385–3394, [https://doi.org/10.1016/S1352-2310\(01\)00138-8](https://doi.org/10.1016/S1352-2310(01)00138-8), 2001.
- Li, D., Xue, L., Wen, L., Wang, X., Chen, T., Mellouki, A., Chen, J., and Wang, W.:

- Characteristics and sources of nitrous acid in an urban atmosphere of northern China: Results from 1-yr continuous observations, *Atmos. Environ.*, 182, 296–306, <https://doi.org/10.1016/j.atmosenv.2018.03.033>, 2018.
- Li, S., Song, W., Zhan, H., Zhang, Y., Zhang, X., Li, W., Tong, S., Pei, C., Wang, Y., Chen, Y., Huang, Z., Zhang, R., Zhu, M., Fang, H., Wu, Z., Wang, J., Luo, S., Fu, X., Xiao, S., Huang, X., Zeng, J., Zhang, H., Chen, D., Gligorovski, S., Ge, M., George, C., and Wang, X.: Contribution of vehicle emission and NO<sub>2</sub> surface conversion to nitrous acid (HONO) in urban environments: Implications from tests in a tunnel, *Environ. Sci. Technol.*, 55, 15616–15624, <https://doi.org/10.1021/acs.est.1c00405>, 2021.
- Li, X., Brauers, T., Haseler, R., Bohn, B., Fuchs, H., Hofzumahaus, A., Holland, F., Lou, S., Lu, K.D., Rohrer, F., Hu, M., Zeng, L.M., Zhang, Y.H., Garland, R.M., Su, H., Nowak, A., Wiedensohler, A., Takegawa, N., Shao, M., and Wahner, A.: Exploring the atmospheric chemistry of nitrous acid (HONO) at a rural site in Southern China. *Atmos. Chem. Phys.*, 12, 1497–1513, <https://doi.org/10.5194/acp-12-1497-2012>, 2012.
- Liu, J., Liu, Z., Ma, Z., Yang, S., Yao, D., Zhao, S., Hu, B., Tang, G., Sun, J., Cheng, M., Xu, Z., and Wang, Y.: Detailed budget analysis of HONO in Beijing, China: Implication on atmosphere oxidation capacity in polluted megacity, *Atmos. Environ.*, 244, <https://doi.org/10.1016/j.atmosenv.2020.117957>, 2021a.
- Liu, M., Song, Y., Zhou, T., Xu, Z., Yan, C., Zheng, M., Wu, Z., Hu, M., Wu, Y., and Zhu, T.: Fine particle pH during severe haze episodes in northern China, *Geophys. Res. Lett.*, 44, 5213–5221, <https://doi.org/10.1002/2017gl073210>, 2017.
- Liu, P., Zhao, X., Zhang, C., Chen, H., Wang, J., Xue, L., Chen, J., and Mu, Y.: Fine particle pH and its influencing factors during summer at Mt. Tai: Comparison between mountain and urban sites, *Atmos. Environ.*, 261, <https://doi.org/10.1016/j.atmosenv.2021.118607>, 2021.
- Liu, Y., Ni, S., Jiang, T., Xing, S., Zhang, Y., Bao, X., Feng, Z., Fan, X., Zhang, L., and Feng, H.: Influence of Chinese New Year overlapping COVID-19 lockdown on HONO sources in Shijiazhuang, *Sci. Total Environ.*, 745, 141025, <http://10.1016/j.scitotenv.2020.141025>,

2020a.

Liu, Y., Zhang, Y., Lian, C., Yan, C., Feng, Z., Zheng, F., Fan, X., Chen, Y., Wang, W., Chu, B., Wang, Y., Cai, J., Du, W., Daellenbach, K., Kangasluoma, J., Bianchi, F., Kujansuu, J., Petäjä, T., Wang, X., Hu, B., Wang, Y., Ge, M., He, H., and Kulmala, M.: The promotion effect of nitrous acid on aerosol formation in wintertime in Beijing: the possible contribution of traffic-related emissions, *Atmos. Chem. Phys.*, 20, 13023–13040, <https://doi.org/10.5194/acp-20-13023-2020>, 2020b.

Lv, S., Wang, F., Wu, C., Chen, Y., Liu, S., Zhang, S., Li, D., Du, W., Zhang, F., Wang, H., Huang, C., Fu, Q., Duan, Y., and Wang, G.: Gas-to-aerosol phase partitioning of atmospheric water-soluble organic compounds at a rural site in China: an enhancing effect of NH<sub>3</sub> on SOA formation. *Environ. Sci. Technol.*, 56, 3915–3924, <https://doi.org/10.1021/acs.est.1c06855>, 2022.

Lyu, X., Wang, N., Guo, H., Xue, L., Jiang, F., Zeren, Y., Cheng, H., Cai, Z., Han, L., and Zhou, Y.: Causes of a continuous summertime O<sub>3</sub> pollution event in Jinan, a central city in the North China Plain, *Atmos. Chem. Phys.*, 19, 3025–3042, <https://doi.org/10.5194/acp-19-3025-2019>, 2019.

Meng, F., Qin, M., Tang, K., Duan, J., Fang, W., Liang, S., Ye, K., Xie, P., Sun, Y., Xie, C., Ye, C., Fu, P., Liu, J., and Liu, W.: High-resolution vertical distribution and sources of HONO and NO<sub>2</sub> in the nocturnal boundary layer in urban Beijing, China, *Atmos. Chem. Phys.*, 20, 5071–5092, <https://doi.org/10.5194/acp-20-5071-2020>, 2020.

Mikuska, P., Motyka, K., and Vecera, Z.: Determination of nitrous acid in air using wet effluent diffusion denuder–FIA technique, *Talanta*, 77, 635–641, <https://doi.org/10.1016/j.talanta.2008.07.008>, 2008.

Nah, T., Guo, H., Sullivan, A. P., Chen, Y., Tanner, D. J., Nenes, A., Russell, A., Ng, N. L., Huey, L. G., and Weber, R. J.: Characterization of aerosol composition, aerosol acidity, and organic acid partitioning at an agriculturally intensive rural southeastern US site, *Atmos. Chem. Phys.*, 18, 11471–11491, <https://doi.org/10.5194/acp-18-11471-2018>, 2018.

- Rumsey, I. C., Cowen, K. A., Walker, J. T., Kelly, T. J., Hanft, E. A., Mishoe, K., Rogers, C., Proost, R., Beachley, G. M., Lear, G., Frelink, T., and Otjes, R. P.: An assessment of the performance of the Monitor for aerosols and gases in ambient air (MARGA): a semi-continuous method for soluble compounds. *Atmos. Chem. and Phys.*, 14, 5639–5658, <https://doi.org/10.5194/acp-14-5639-2014>, 2014.
- Saraswati, Sharma, S. K., Saxena, M., and Mandal, T. K.: Characteristics of gaseous and particulate ammonia and their role in the formation of secondary inorganic particulate matter at Delhi, India, *Atmos. Res.*, 218, 34–49, <https://doi.org/10.1016/j.atmosres.2018.11.010>, 2019.
- Seinfeld, J. H., Pandis, S. N., and Noone, K. J.: Atmospheric chemistry and physics: from air pollution to climate change. *Phys. Today*, 51, 88–90, <https://doi.org/10.1063/1.882420>, 1998.
- Shi, G., Xu, J., Peng, X., Xiao, Z., Chen, K., Tian, Y., Guan, X., Feng, Y., Yu, H., Nenes, A., and Russell, A. G.: pH of pH of aerosols in a polluted atmosphere: source contributions to highly acidic aerosol. *Environ. Sci. Technol.*, 51, 4289–4296, <https://doi.org/10.1021/acs.est.6b05736>, 2017.
- Shi, G., Xu, J., Shi, X., Liu, B., Bi, X., Xiao, Z., Chen, K., Wen, J., Dong, S., Tian, Y., Feng, Y., Yu, H., Song, S., Zhao, Q., Gao, J., and Russell, A. G.: Aerosol pH dynamics during haze periods in an urban environment in China: use of detailed, hourly, speciated observations to study the role of ammonia availability and secondary aerosol formation and urban environment. *J. Geophys. Res. Atmos.*, 124, 9730–9742, <https://doi.org/10.1029/2018jd029976>, 2019.
- Song, S., Gao, M., Xu, W., Shao, J., Shi, G., Wang, S., Wang, Y., Sun, Y., and McElroy, M. B.: Fine-particle pH for Beijing winter haze as inferred from different thermodynamic equilibrium models, *Atmos. Chem. Phys.*, 18, 7423–7438, <https://doi.org/10.5194/acp-18-7423-2018>, 2018.
- Su, H., Cheng, Y. F., Cheng, P., Zhang, Y. H., Dong, S., Zeng, L. M., Wang, X., Slanina, J.,

- Shao, M., and Wiedensohler, A.: Observation of nighttime nitrous acid (HONO) formation at a non-urban site during PRIDE-PRD2004 in China, *Atmos. Environ.*, 42, 6219–6232, <https://doi.org/10.1016/j.atmosenv.2008.04.006>, 2008.
- Su, H., Cheng, Y., Oswald, R., Behrendt, T., Trebs, I., Meixner, F. X., Andreae, M. O., Cheng, P., Zhang, Y. H., and Poschl, U.: Soil nitrite as a source of atmospheric HONO and OH radicals, *Science*, 333, 1616–1618, <https://doi.org/10.1126/science.1208839>, 2011.
- Takeuchi M, M. Y., Tsunoda H, Tanaka H.: Atmospheric acid gases in tokushima, Japan, monitored with parallel plate wet denuder coupled ion chromatograph. *Anal. Sci.* 29, 165–168, <https://doi.org/10.2116/analsci.29.165>, 2013.
- VandenBoer, T. C., Brown, S. S., Murphy, J. G., Keene, W. C., Young, C. J., Pszenny, A. A. P., Kim, S., Warneke, C., de Gouw, J. A., Maben, J. R., Wagner, N. L., Riedel, T. P., Thornton, J. A., Wolfe, D. E., Dubé, W. P., Öztürk, F., Brock, C. A., Grossberg, N., Lefer, B., Lerner, B., Middlebrook, A. M., and Roberts, J. M.: Understanding the role of the ground surface in HONO vertical structure: High resolution vertical profiles during NACHTT-11, *J. Geophys. Res.: Atmos.*, <https://doi.org/10.1002/jgrd.50721>, 2013.
- VandenBoer, T. C., Markovic, M. Z., Sanders, J. E., Ren, X., Pusede, S. E., Browne, E. C., Cohen, R. C., Zhang, L., Thomas, J., Brune, W. H., and Murphy, J. G.: Evidence for a nitrous acid (HONO) reservoir at the ground surface in Bakersfield, CA, during CalNex 2010. *J. Geophys. Res.: Atmos.*, 119, 9093–9106, <https://doi.org/10.1002/2013jd020971>, 2014.
- Veres, P., Roberts, J. M., Burling, I. R., Warneke, C., de Gouw, J., and Yokelson, R. J.: Measurements of gas-phase inorganic and organic acids from biomass fires by negative-ion proton-transfer chemical-ionization mass spectrometry., *J. Geophys. Res.: Atmos.*, 115, D23302, <https://doi.org/10.1029/2010jd014033>, 2010.
- Wang, G., Zhang, R., Gomez, M. E., Yang, L., Levy Zamora, M., Hu, M., Lin, Y., Peng, J., Guo, S., Meng, J., Li, J., Cheng, C., Hu, T., Ren, Y., Wang, Y., Gao, J., Cao, J., An, Z., Zhou, W., Li, G., Wang, J., Tian, P., Marrero-Ortiz, W., Secret, J., Du, Z., Zheng, J., Shang, D., Zeng,



- L., Shao, M., Wang, W., Huang, Y., Wang, Y., Zhu, Y., Li, Y., Hu, J., Pan, B., Cai, L., Cheng, Y., Ji, Y., Zhang, F., Rosenfeld, D., Liss, P. S., Duce, R. A., Kolb, C. E., and Molina, M. J.: Persistent sulfate formation from London Fog to Chinese haze. *Proc. Natl. Acad. of Sci. U. S. A.*, 113, 13630–13635, <https://doi.org/10.1073/pnas.1616540113>, 2016a.
- Wang, H., Ding, J., Xu, J., Wen, J., Han, J., Wang, K., Shi, G., Feng, Y., Ivey, C. E., Wang, Y., Nenes, A., Zhao, Q., and Russell, A. G.: Aerosols in an arid environment: the role of aerosol water content, particulate acidity, precursors, and relative humidity on secondary inorganic aerosols. *Sci. Total Environ.*, 646, 564–572, <https://doi.org/10.1016/j.scitotenv.2018.07.321>, 2019.
- Wang, M., Wang, S., Zhang, R., Yuan, M., Xu, Y., Shang, L., Song, X., Zhang, X., and Zhang, Y.: Exploring the HONO source during the COVID-19 pandemic in a megacity in China, *J. Environ. Sci.*, 149, 616–627, <https://doi.org/10.1016/j.jes.2023.12.021>, 2025.
- Wang, R., Ye, X., Liu, Y., Li, H., Yang, X., Chen, J., Gao, W., and Yin, Z.: Characteristics of atmospheric ammonia and its relationship with vehicle emissions in a megacity in China, *Atmos. Environ.* 182, 97–104, <https://doi.org/10.1016/j.atmosenv.2018.03.047>, 2018.
- Wang, S., Wang, L., Li, Y., Wang, C., Wang, W., Yin, S., and Zhang, R.: Effect of ammonia on fine-particle pH in agricultural regions of China: comparison between urban and rural sites, *Atmos. Chem. Phys.* 20, 2719–2734, <https://doi.org/10.5194/acp-20-2719-2020>, 2020.
- Wang, W., Wang, S., Xu, J., Zhou, R., Shi, C., and Zhou, B.: Gas-phase ammonia and PM<sub>2.5</sub> ammonium in a busy traffic area of Nanjing, China, *Environ. Sci. Pollut. Res. Int.*, 23, 1691–1702, <https://doi.org/10.1007/s11356-015-5397-3>, 2016b.
- Wang, X., Yin, S., Zhang, R., Yuan, M., and Ying, Q.: Assessment of summertime O<sub>3</sub> formation and the O<sub>3</sub>-NO<sub>x</sub>-VOC sensitivity in Zhengzhou, China using an observation-based model. *Sci. Total Environ.*, 813, 152449, <https://doi.org/10.1016/j.scitotenv.2021.152449>, 2022.
- Wang, Y., Zhu, S., Ma, J., Shen, J., Wang, P., Wang, P., and Zhang, H.: Enhanced atmospheric oxidation capacity and associated ozone increases during COVID-19 lockdown in the Yangtze River Delta, *Sci. Total Environ.*, 768, 144796,

- <https://doi.org/10.1016/j.scitotenv.2020.144796>, 2021.
- Wong, K. W., Oh, H. J., Lefer, B. L., Rappenglück, B., and Stutz, J.: Vertical profiles of nitrous acid in the nocturnal urban atmosphere of Houston, TX, *Atmos. Chem. Phys.*, 11, 3595–3609, <https://doi.org/10.5194/acp-11-3595-2011>, 2011.
- Wu, S., Zhang, Y., Schwab, J., Li, Y., Liu, Y., and Yuan, C.: High-resolution ammonia emissions inventories in Fujian, China, 2009–2015, *Atmos. Environ.*, 162, 100–114, <https://doi.org/10.1016/j.atmosenv.2017.04.027>, 2017.
- Xu, W., Kuang, Y., Zhao, C., Tao, J., Zhao, G., Bian, Y., Yang, W., Yu, Y., Shen, C., Liang, L., Zhang, G., Lin, W., and Xu, X.: NH<sub>3</sub>-promoted hydrolysis of NO<sub>2</sub> induces explosive growth in HONO, *Atmos. Chem. Phys.*, 19, 10557–10570, <https://doi.org/10.5194/acp-19-10557-2019>, 2019.
- Xu, Z., Wang, T., Wu, J., Xue, L., Chan, J., Zha, Q., Zhou, S., Louie, P. K. K., and Luk, C. W. Y.: Nitrous acid (HONO) in a polluted subtropical atmosphere: Seasonal variability, direct vehicle emissions and heterogeneous production at ground surface, *Atmos. Environ.*, 106, 100–109, <https://doi.org/10.1016/j.atmosenv.2015.01.061>, 2015.
- Yang, Y., Shao, M., Keßel, S., Li, Y., Lu, K., Lu, S., Williams, J., Zhang, Y., Zeng, L., Nölscher, A. C., Wu, Y., Wang, X., and Zheng, J.: How the OH reactivity affects the ozone production efficiency: case studies in Beijing and Heshan, China, *Atmos. Chem. Phys.*, 17, 7127–7142, <https://doi.org/10.5194/acp-17-7127-2017>, 2017.
- Yu, Y., Cheng, P., Li, H., Yang, W., Han, B., Song, W., Hu, W., Wang, X., Yuan, B., Shao, M., Huang, Z., Li, Z., Zheng, J., Wang, H., and Yu, X.: Budget of nitrous acid (HONO) at an urban site in the fall season of Guangzhou, China, *Atmos. Chem. Phys.*, 22, 8951–8971, <https://doi.org/10.5194/acp-22-8951-2022>, 2022.
- Yun, H., Wang, Z., Zha, Q., Wang, W., Xue, L., Zhang, L., Li, Q., Cui, L., Lee, S., Poon, S. C. N., and Wang, T.: Nitrous acid in a street canyon environment: Sources and contributions to local oxidation capacity, *Atmos. Environ.*, 167, 223–234, <https://doi.org/10.1016/j.atmosenv.2017.08.018>, 2017.

- Zellweger, M. A., P.Hofer,U.Baltensperger.: NO<sub>y</sub> speciation with a combined wet effluent diffusion denuder–aerosol collector coupled to ion chromatography, *Atmos. Environ.*, 33, 1131–1140, [https://doi.org/10.1016/s1352-2310\(98\)00295-7](https://doi.org/10.1016/s1352-2310(98)00295-7), 1999.
- Zhang, Q., Liu, P., Wang, Y., Gerorge, C., Chen, T., Ma, S. L., Ren, Y., Mu, Y., Song, M., Herrmann, H., Mellouki, A., Chen, J., Zhao, X., Wang, S., and Y., Z.: Unveiling the underestimated direct emissions of nitrous acid (HONO), *Proc. Natl. Acad. Sci. U.S.A.*, 120, <https://doi.org/10.1073/pnas.2302048120>, 2023
- Zhang, S., Sarwar, G., Xing, J., Chu, B., Xue, C., Sarav, A., Ding, D., Zheng, H., Mu, Y., Duan, F., Ma, T., and He, H.: Improving the representation of HONO chemistry in CMAQ and examining its impact on haze over China, *Atmos. Chem. Phys.*, 21, 15809–15826, <https://doi.org/10.5194/acp-21-15809-2021>, 2021.
- Zhang, W., Tong, S., Jia, C., Wang, L., Liu, B., Tang, G., Ji, D., Hu, B., Liu, Z., Li, W., Wang, Z., Liu, Y., Wang, Y., and Ge, M.: Different HONO sources for three layers at the urban area of Beijing. *Environ. Sci. Technol.*, 54, 12870–12880, <https://doi.org/10.1021/acs.est.0c02146>, 2020a.
- Zhang, Y., Liu, X., Fang, Y., Liu, D., Tang, A., and Collett, J. L.: Atmospheric ammonia in Beijing during the COVID-19 outbreak: concentrations, sources, and implications. *Environ. Sci. Technol. Lett.* 8, 32–38, <https://doi.org/10.1021/acs.estlett.0c00756>, 2020b.
- Zhao, Y., Zhang, N., Wei, Q., Han, Y., Mao, K., Cai, Y., and Li, R.: Flow injection chemiluminescence method in analytical chemistry., *Spectrosc. Spectra. Anal.*, 30, 2512–2517., <https://doi.org/11-2200/O4WCNKI>, 2010.
